# Supplementary material for: Integration of genetics and miRNA–target gene network identified disease biology implicated in tissue specificity
Source: PubMed Central journal article supplement — Nucleic Acids Res. 2018 Nov 8;46(22):11898–909. doi: 10.1093/nar/gky1066 (PMC6294505; doi:10.1093/nar/gky1066), 2018-11-08
Supplement: gky1066_supplemental_files.pdf [file gky1066_supplemental_files.pdf]

## **Supplementary Materials**

---

### **Integration of genetics and miRNA-target gene network identified disease biology implicated in tissue specificity**

Corresponding author: Yukinori Okada, MD, PhD (yokada@sg.med.osaka-u.ac.jp)

**Supplementary Table S1. Summary of cell-type specific miRNA expression data used in MIGWAS.**

| Anatomical category | Cell names                                   | No. highly and specifically expressed miRNAs | Library ID                                                                                                                                                                                                                                                                                                                                                                                                                                                  |
|---------------------|----------------------------------------------|----------------------------------------------|-------------------------------------------------------------------------------------------------------------------------------------------------------------------------------------------------------------------------------------------------------------------------------------------------------------------------------------------------------------------------------------------------------------------------------------------------------------|
| bone                | annulus pulposus cell                        | 167                                          | SRhi10004.TTAGGC.11248,SRhi10004.CTTGTA.11463                                                                                                                                                                                                                                                                                                                                                                                                               |
| bone                | bone cell                                    | 169                                          | SRhi10006.CAGATC.11219,SRhi10003.CAGATC.11536,SRhi10010.GTTT CG.11697,SRhi10013.GGTAGC.11464                                                                                                                                                                                                                                                                                                                                                                |
| bone                | chondrocyte                                  | 167                                          | SRhi10011.TTAGGC.11261,SRhi10011.CTTGTA.11338,SRhi10012.GTGA AA.11410,SRhi10012.TTAGGC.11262,SRhi10012.CTTGTA.11339,SRhi10 013.GTGAAA.11411                                                                                                                                                                                                                                                                                                                 |
| bone                | fibroblast of periodontium                   | 170                                          | SRhi10007.ACAGTG.11238,SRhi10004.AGTTCC.11319,SRhi10003.GTT TCG.11395                                                                                                                                                                                                                                                                                                                                                                                       |
| bone                | human chondrocyte de- differentiated sample  | 164                                          | SRhi10011.TTAGGC.11261,SRhi10011.CTTGTA.11338,SRhi10012.GTGA AA.11410                                                                                                                                                                                                                                                                                                                                                                                       |
| bone                | human chondrocyte re- differentiated sample  | 165                                          | SRhi10012.TTAGGC.11262,SRhi10012.CTTGTA.11339,SRhi10013.GTGA AA.11411                                                                                                                                                                                                                                                                                                                                                                                       |
| bone                | nucleus pulposus cell of intervertebral disc | 195                                          | SRhi10013.ATGTCA.11252,SRhi10014.CAGATC.11462                                                                                                                                                                                                                                                                                                                                                                                                               |
| bone                | osteoblast                                   | 168                                          | SRhi10014.ATGTCA.11276,SRhi10003.CGTACG.11353,SRhi10015.CAG ATC.11425,SRhi10015.ATGTCA.11277,SRhi10004.CGTACG.11354,SRhi1 0002.ACTTGA.11426                                                                                                                                                                                                                                                                                                                 |
| bone                | trabecular meshwork cell                     | 175                                          | SRhi10008.GTCCGC.11532,SRhi10005.GGTAGC.11612                                                                                                                                                                                                                                                                                                                                                                                                               |
| bone                | vertebral mesenchymal stem cell              | 93                                           | SRhi10006.CAGATC.11219                                                                                                                                                                                                                                                                                                                                                                                                                                      |
| brain               | astrocyte of the cerebellum                  | 168                                          | SRhi10005.TTAGGC.11500,SRhi10006.GTGAAA.11661                                                                                                                                                                                                                                                                                                                                                                                                               |
| brain               | astrocyte of the cerebral cortex             | 169                                          | SRhi10006.TTAGGC.11235,SRhi10006.CTTGTA.11316,SRhi10007.GTGA AA.11392                                                                                                                                                                                                                                                                                                                                                                                       |
| brain               | brain macroglial cell                        | 168                                          | SRhi10005.TTAGGC.11500,SRhi10006.GTGAAA.11661,SRhi10006.TTAG GC.11235,SRhi10006.CTTGTA.11316,SRhi10007.GTGAAA.11392                                                                                                                                                                                                                                                                                                                                         |
| brain               | central nervous system pericyte              | 176                                          | SRhi10002.CCGTCC.11491,SRhi10004.ACTTGA.11652                                                                                                                                                                                                                                                                                                                                                                                                               |
| brain               | fibroblast of choroid plexus                 | 146                                          | SRhi10014.TGACCA.11492                                                                                                                                                                                                                                                                                                                                                                                                                                      |
| brain               | glial cell (sensu Vertebrata)                | 168                                          | SRhi10005.TTAGGC.11500,SRhi10006.GTGAAA.11661,SRhi10006.TTAG GC.11235,SRhi10006.CTTGTA.11316,SRhi10007.GTGAAA.11392,SRhi1 0008.GATCAG.11498                                                                                                                                                                                                                                                                                                                 |
| brain               | human diencephalon - adult sample            | 168                                          | SRhi10006.ACTTGA.10160,SRhi10007.ACTTGA.10162                                                                                                                                                                                                                                                                                                                                                                                                               |
| brain               | human pineal gland - adult sample            | 162                                          | SRhi10006.ACTTGA.10160                                                                                                                                                                                                                                                                                                                                                                                                                                      |
| brain               | human pituitary gland - adult sample         | 172                                          | SRhi10007.ACTTGA.10162                                                                                                                                                                                                                                                                                                                                                                                                                                      |
| brain               | human spinal cord - adult sample             | 162                                          | SRhi10003.GGCTAC.10159                                                                                                                                                                                                                                                                                                                                                                                                                                      |
| brain               | leptomeningeal cell                          | 168                                          | SRhi10011.GCCAAT.11493,SRhi10002.ATGTCA.11573                                                                                                                                                                                                                                                                                                                                                                                                               |
| brain               | neural cell                                  | 168                                          | SRhi10005.TTAGGC.11500,SRhi10006.GTGAAA.11661,SRhi10006.TTAG GC.11235,SRhi10006.CTTGTA.11316,SRhi10007.GTGAAA.11392,SRhi1 0014.TGACCA.11492,SRhi10011.GCCAAT.11493,SRhi10002.ATGTCA.11 573,SRhi10014.GTTTCG.11352,SRhi10012.CAGATC.11424,SRhi10002.C CGTCC.11491,SRhi10004.ACTTGA.11652,SRhi10015.CCGTCC.11215,S Rhi10015.CGTACG.11528,SRhi10007.GATCAG.11608,SRhi10008.GATC AG.11498,SRhi10011.GTAGAG.11234,SRhi10009.GAGTGG.11315,SRhi1 0003.TAGCTT.11391 |
| brain               | neuronal stem cell                           | 164                                          | SRhi10014.GTTTCG.11352,SRhi10012.CAGATC.11424                                                                                                                                                                                                                                                                                                                                                                                                               |
| brain               | Schwann cell                                 | 176                                          | SRhi10008.GATCAG.11498                                                                                                                                                                                                                                                                                                                                                                                                                                      |
| cardiac             | cardiocyte                                   | 168                                          | SRhi10013.TGACCA.11268,SRhi10012.AGTCAA.11345,SRhi10011.GTG GCC.11417,SRhi10014.GTAGAG.11286,SRhi10012.GAGTGG.11363,SRh i10007.TAGCTT.11435                                                                                                                                                                                                                                                                                                                 |
| cardiac             | fibroblast of cardiac tissue                 | 169                                          | SRhi10013.TGACCA.11268,SRhi10012.AGTCAA.11345,SRhi10011.GTG GCC.11417                                                                                                                                                                                                                                                                                                                                                                                       |
| cardiac             | smooth muscle cell of the coronary artery    | 178                                          | SRhi10014.GTAGAG.11286,SRhi10012.GAGTGG.11363,SRhi10007.TAG CTT.11435                                                                                                                                                                                                                                                                                                                                                                                       |
| eye                 | corneal epithelial cell                      | 167                                          | SRhi10015.TTAGGC.11526,SRhi10014.CTTGTA.11606,SRhi10015.GTGA AA.11687                                                                                                                                                                                                                                                                                                                                                                                       |
| eye                 | fibroblast of the conjunctiva                | 178                                          | SRhi10015.TGACCA.11531                                                                                                                                                                                                                                                                                                                                                                                                                                      |
| eye                 | retinal pigment epithelial cell              | 168                                          | SRhi10015.CCGTCC.11215,SRhi10015.CGTACG.11528,SRhi10007.GAT CAG.11608                                                                                                                                                                                                                                                                                                                                                                                       |
| fat                 | acinar cell of sebaceous gland               | 168                                          | SRhi10002.GTAGAG.11220,SRhi10002.GAGTGG.11301,SRhi10009.GAT CAG.11378                                                                                                                                                                                                                                                                                                                                                                                       |
| fat                 | adipocyte of breast                          | 170                                          | SRhi10011.CGATGT.11376,SRhi10013.GGCTAC.11327                                                                                                                                                                                                                                                                                                                                                                                                               |
| fat                 | adipocyte of omentum tissue                  | 168                                          | SRhi10012.CGATGT.11473,SRhi10014.GGCTAC.11474,SRhi10002.GTG AAA.11475                                                                                                                                                                                                                                                                                                                                                                                       |

|                  |                                                                 |     |                                                                                                                                                                                                                                                                                                                                                                                                                                     |
|------------------|-----------------------------------------------------------------|-----|-------------------------------------------------------------------------------------------------------------------------------------------------------------------------------------------------------------------------------------------------------------------------------------------------------------------------------------------------------------------------------------------------------------------------------------|
| fat              | fat cell                                                        | 168 | SRhi10011.CGATGT.11376,SRhi10013.GGCTAC.11327,SRhi10012.CGATG T.11473,SRhi10014.GGCTAC.11474,SRhi10002.GTGAAA.11475,SRhi1001 3.CGATGT.11476,SRhi10014.CGATGT.11259,SRhi10015.GGCTAC.11336,S Rhi10003.GTGAAA.11408                                                                                                                                                                                                                   |
| fat              | fibroblast of mammary gland                                     | 166 | SRhi10006.ACAGTG.11540,SRhi10003.AGTTCC.11620,SRhi10002.GTTTC G.11701                                                                                                                                                                                                                                                                                                                                                               |
| fat              | mammary gland epithelial cell                                   | 162 | SRhi10007.GCCAAT.11273,SRhi10013.AGTTCC.11350,SRhi10007.GTTTC G.11422                                                                                                                                                                                                                                                                                                                                                               |
| fat              | mesenchymal stem cell of adipose                                | 165 | SRhi10012.GCCAAT.11217,SRhi10015.GCCAAT.11537,SRhi10003.ATGTC A.11617                                                                                                                                                                                                                                                                                                                                                               |
| fat              | omentum preadipocyte                                            | 168 | SRhi10006.CCGTCC.11468,SRhi10008.CGTACG.11329,SRhi10010.ACTT GA.11403                                                                                                                                                                                                                                                                                                                                                               |
| fat              | perirenal adipocyte cell                                        | 179 | SRhi10013.CGATGT.11476                                                                                                                                                                                                                                                                                                                                                                                                              |
| fat              | perirenal preadipocyte                                          | 181 | SRhi10011.ACTTGA.11469                                                                                                                                                                                                                                                                                                                                                                                                              |
| fat              | preadipocyte                                                    | 168 | SRhi10007.CGTACG.11328,SRhi10006.CCGTCC.11468,SRhi10008.CGTA CG.11329,SRhi10010.ACTTGA.11403,SRhi10011.ACTTGA.11469,SRhi100 07.CCGTCC.11279,SRhi10009.CGTACG.11356,SRhi10012.ACTTGA.11428 ,SRhi10008.CCGTCC.11280,SRhi10010.CGTACG.11357,SRhi10013.ACTT GA.11429                                                                                                                                                                    |
| fat              | preadipocyte of the breast                                      | 187 | SRhi10007.CGTACG.11328                                                                                                                                                                                                                                                                                                                                                                                                              |
| fat              | subcutaneous fat cell                                           | 160 | SRhi10014.CGATGT.11259,SRhi10015.GGCTAC.11336,SRhi10003.GTGAA A.11408                                                                                                                                                                                                                                                                                                                                                               |
| fat              | subcutaneous preadipocyte                                       | 169 | SRhi10007.CCGTCC.11279,SRhi10009.CGTACG.11356,SRhi10012.ACTT GA.11428                                                                                                                                                                                                                                                                                                                                                               |
| fat              | visceral preadipocyte                                           | 169 | SRhi10008.CCGTCC.11280,SRhi10010.CGTACG.11357,SRhi10013.ACTT GA.11429                                                                                                                                                                                                                                                                                                                                                               |
| fetal            | amnion mesenchymal stem cell                                    | 169 | SRhi10002.CAGATC.11547,SRhi10004.ATGTCA.11627,SRhi10003.TTAGG C.12237                                                                                                                                                                                                                                                                                                                                                               |
| fetal            | chorionic membrane mesenchymal stem cell                        | 173 | SRhi10013.TTAGGC.12240                                                                                                                                                                                                                                                                                                                                                                                                              |
| fetal            | embryonic stem cell                                             | 168 | SRhi10037.AGTTCC.3902,SRhi10037.CGTACG.3903,SRhi10037.GGTAGC .3904                                                                                                                                                                                                                                                                                                                                                                  |
| fetal            | endothelial cell of umbilical vein                              | 171 | SRhi10008.TGACCA.11243,SRhi10007.AGTCAA.11324,SRhi10007.GTGG CC.11400                                                                                                                                                                                                                                                                                                                                                               |
| fetal            | epithelial cell of amnion                                       | 169 | SRhi10002.TTAGGC.11533,SRhi10003.CTTGTA.11613,SRhi10005.GTGAA A.11694                                                                                                                                                                                                                                                                                                                                                               |
| fetal            | extraembryonic cell                                             | 168 | SRhi10002.TTAGGC.11533,SRhi10003.CTTGTA.11613,SRhi10005.GTGAA A.11694,SRhi10010.ACAGTG.11535,SRhi10007.CAGATC.11548,SRhi1000 2.CAGATC.11547,SRhi10004.ATGTCA.11627,SRhi10014.GCCAAT.11214,S Rhi10005.CAGATC.11539,SRhi10006.ATGTCA.11619,SRhi10011.GTTTCG. 11700,SRhi10008.ATGTCA.11549,SRhi10009.CAGATC.11629,SRhi10004. CCGTCC.11278,SRhi10006.CGTACG.11355,SRhi10008.ACTTGA.11427,S Rhi10003.TTAGGC.12237,SRhi10013.TTAGGC.12240 |
| fetal            | human amniotic membrane cell- Amnion sample                     | 166 | SRhi10003.TTAGGC.12237                                                                                                                                                                                                                                                                                                                                                                                                              |
| fetal            | human amniotic membrane cell- fetal sample                      | 176 | SRhi10002.CAGATC.11547,SRhi10004.ATGTCA.11627                                                                                                                                                                                                                                                                                                                                                                                       |
| fetal            | human mesenchymal stem cell of umbilical cord- Sciencell sample | 168 | SRhi10007.CAGATC.11548,SRhi10014.GCCAAT.11214,SRhi10005.CAGAT C.11539,SRhi10006.ATGTCA.11619,SRhi10011.GTTTCG.11700                                                                                                                                                                                                                                                                                                                 |
| fetal            | mesenchymal stem cell of umbilical cord                         | 168 | SRhi10007.CAGATC.11548,SRhi10014.GCCAAT.11214,SRhi10005.CAGAT C.11539,SRhi10006.ATGTCA.11619,SRhi10011.GTTTCG.11700,SRhi10008 .ATGTCA.11549,SRhi10009.CAGATC.11629                                                                                                                                                                                                                                                                  |
| fetal            | mesenchymal stem cell of Whartons jelly                         | 167 | SRhi10007.CAGATC.11548                                                                                                                                                                                                                                                                                                                                                                                                              |
| fetal            | placental epithelial cell                                       | 168 | SRhi10004.CCGTCC.11278,SRhi10006.CGTACG.11355,SRhi10008.ACTT GA.11427                                                                                                                                                                                                                                                                                                                                                               |
| fetal            | smooth muscle cell of the umbilical artery                      | 166 | SRhi10015.TAGCTT.11212,SRhi10005.GTCCGC.11290,SRhi10003.GGTAG C.11367,SRhi10014.TAGCTT.11439                                                                                                                                                                                                                                                                                                                                        |
| fetal            | fibroblast of villous mesenchyme                                | 189 | SRhi10010.ACAGTG.11535                                                                                                                                                                                                                                                                                                                                                                                                              |
| gastrointestinal | epithelial cell of alimentary canal                             | 168 | SRhi10011.TGACCA.11507,SRhi10010.AGTCAA.11587,SRhi10011.ACAGT G.11302,SRhi10006.AGTTCC.11379,SRhi10002.GCCAAT.11246,SRhi1000 4.GCCAAT.11251                                                                                                                                                                                                                                                                                         |
| gastrointestinal | epithelial cell of esophagus                                    | 171 | SRhi10011.TGACCA.11507,SRhi10010.AGTCAA.11587                                                                                                                                                                                                                                                                                                                                                                                       |
| gastrointestinal | fibroblast of gingiva                                           | 160 | SRhi10003.ACAGTG.11237,SRhi10014.AGTCAA.11318,SRhi10013.GTGG CC.11394                                                                                                                                                                                                                                                                                                                                                               |
| gastrointestinal | gingival epithelial cell                                        | 157 | SRhi10011.ACAGTG.11302,SRhi10006.AGTTCC.11379                                                                                                                                                                                                                                                                                                                                                                                       |
| gastrointestinal | intestinal epithelial cell                                      | 169 | SRhi10002.GCCAAT.11246                                                                                                                                                                                                                                                                                                                                                                                                              |
| gastrointestinal | keratinized cell of the oral mucosa                             | 173 | SRhi10004.GCCAAT.11251                                                                                                                                                                                                                                                                                                                                                                                                              |
| gastrointestinal | smooth muscle cell of the esophagus                             | 159 | SRhi10008.TAGCTT.11508                                                                                                                                                                                                                                                                                                                                                                                                              |

|               |                                          |     |                                                                                                                                                                                                                                                                                                                                                                                                                                                                                                                                                                                                                                                                                                                                                                                                                                                                                               |
|---------------|------------------------------------------|-----|-----------------------------------------------------------------------------------------------------------------------------------------------------------------------------------------------------------------------------------------------------------------------------------------------------------------------------------------------------------------------------------------------------------------------------------------------------------------------------------------------------------------------------------------------------------------------------------------------------------------------------------------------------------------------------------------------------------------------------------------------------------------------------------------------------------------------------------------------------------------------------------------------|
| genitourinary | epithelial cell of prostate              | 169 | SRhi10009.CCGTCC.11253,SRhi10011.CGTACG.11331,SRhi10014.ACTTGA.11404                                                                                                                                                                                                                                                                                                                                                                                                                                                                                                                                                                                                                                                                                                                                                                                                                          |
| genitourinary | prostate stromal cell                    | 165 | SRhi10010.CCGTCC.11254,SRhi10012.CGTACG.11332,SRhi10003.CGATGT.11405                                                                                                                                                                                                                                                                                                                                                                                                                                                                                                                                                                                                                                                                                                                                                                                                                          |
| genitourinary | Sertoli cell                             | 190 | SRhi10003.GTAGAG.11255,SRhi10010.GATCAG.11333                                                                                                                                                                                                                                                                                                                                                                                                                                                                                                                                                                                                                                                                                                                                                                                                                                                 |
| genitourinary | smooth muscle cell of prostate           | 168 | SRhi10002.GTCCGC.11257,SRhi10014.GAGTGG.11335,SRhi10010.TAGC TT.11465                                                                                                                                                                                                                                                                                                                                                                                                                                                                                                                                                                                                                                                                                                                                                                                                                         |
| genitourinary | urothelial cell                          | 176 | SRhi10009.GGCTAC.11216,SRhi10013.GTCCGC.11520,SRhi10010.GGTA GC.11600                                                                                                                                                                                                                                                                                                                                                                                                                                                                                                                                                                                                                                                                                                                                                                                                                         |
| genitourinary | uterine smooth muscle cell               | 166 | SRhi10006.GTCCGC.11258,SRhi10002.GGCTAC.11466                                                                                                                                                                                                                                                                                                                                                                                                                                                                                                                                                                                                                                                                                                                                                                                                                                                 |
| immune        | B cell                                   | 168 | SRhi10066.TAGCTT.11544,SRhi10066.GGCTAC.11624,SRhi10066.CTTGT A.11705,SRhi10084.CCGTCC.4534                                                                                                                                                                                                                                                                                                                                                                                                                                                                                                                                                                                                                                                                                                                                                                                                   |
| immune        | CD14-positive CD16-negative monocyte     | 172 | SRhi10064.CAGATC.11857                                                                                                                                                                                                                                                                                                                                                                                                                                                                                                                                                                                                                                                                                                                                                                                                                                                                        |
| immune        | CD4-positive alpha-beta T cell           | 168 | SRhi10009.TTAGGC.11225,SRhi10009.CTTGTA.11306,SRhi10010.GTGAA A.11382                                                                                                                                                                                                                                                                                                                                                                                                                                                                                                                                                                                                                                                                                                                                                                                                                         |
| immune        | CD8-positive alpha-beta T cell           | 168 | SRhi10010.TTAGGC.11226,SRhi10010.CTTGTA.11307,SRhi10011.GTGAA A.11383                                                                                                                                                                                                                                                                                                                                                                                                                                                                                                                                                                                                                                                                                                                                                                                                                         |
| immune        | endothelial cell of lymphatic vessel     | 167 | SRhi10005.TGACCA.11236,SRhi10004.AGTCAA.11317,SRhi10005.GTGG CC.11393                                                                                                                                                                                                                                                                                                                                                                                                                                                                                                                                                                                                                                                                                                                                                                                                                         |
| immune        | fibroblast of lymphatic vessel           | 164 | SRhi10005.ACAGTG.11506,SRhi10002.AGTTCC.11586,SRhi10015.GTGG CC.11667                                                                                                                                                                                                                                                                                                                                                                                                                                                                                                                                                                                                                                                                                                                                                                                                                         |
| immune        | human CD14-positive monocyte sample      | 168 | SRhi10008.TTAGGC.11224,SRhi10008.CTTGTA.11305,SRhi10009.GTGAA A.11381                                                                                                                                                                                                                                                                                                                                                                                                                                                                                                                                                                                                                                                                                                                                                                                                                         |
| immune        | immature conventional dendritic cell     | 168 | SRhi10002.TGACCA.11227,SRhi10015.CTTGTA.11308,SRhi10002.GTGG CC.11384                                                                                                                                                                                                                                                                                                                                                                                                                                                                                                                                                                                                                                                                                                                                                                                                                         |
| immune        | leukocyte                                | 168 | SRhi10008.TTAGGC.11224,SRhi10008.CTTGTA.11305,SRhi10009.GTGAA A.11381,SRhi10010.TGACCA.11229,SRhi10009.AGTCAA.11310,SRhi1000 9.GTGGCC.11386,SRhi10064.CAGATC.11857,SRhi10066.TAGCTT.11544, SRhi10066.GGCTAC.11624,SRhi10066.CTTGTA.11705,SRhi10009.TTAGG C.11225,SRhi10009.CTTGTA.11306,SRhi10010.GTGAAA.11382,SRhi1001 0.TTAGGC.11226,SRhi10010.CTTGTA.11307,SRhi10011.GTGAAA.11383,S Rhi10002.TGACCA.11227,SRhi10015.CTTGTA.11308,SRhi10002.GTGGC C.11384,SRhi10006.GCCAAT.11232,SRhi10012.AGTTCC.11313,SRhi1000 6.GTTTCG.11389,SRhi10008.GCCAAT.11487,SRhi10009.GCCAAT.11565,S Rhi10014.AGTTCC.11566,SRhi10008.GTTTCG.11567,SRhi10010.ATGTCA .11230,SRhi10013.GTTTCG.11311,SRhi10011.CAGATC.11387,SRhi10012. ATGTCA.11233,SRhi10015.GTTTCG.11314,SRhi10013.CAGATC.11390,SR hi10003.CCGTCC.11231,SRhi10005.CGTACG.11312,SRhi10005.ACTTGA. 11388,SRhi10084.CCGTCC.4534,SRhi10042.AGTCAA.3997 |
| immune        | lymphocyte                               | 168 | SRhi10066.TAGCTT.11544,SRhi10066.GGCTAC.11624,SRhi10066.CTTGT A.11705,SRhi10009.TTAGGC.11225,SRhi10009.CTTGTA.11306,SRhi10010 .GTGAAA.11382,SRhi10010.TTAGGC.11226,SRhi10010.CTTGTA.11307,S Rhi10011.GTGAAA.11383,SRhi10010.ATGTCA.11230,SRhi10013.GTTTCG .11311,SRhi10011.CAGATC.11387,SRhi10084.CCGTCC.4534,SRhi10042.A GTCAA.3997                                                                                                                                                                                                                                                                                                                                                                                                                                                                                                                                                          |
| immune        | macrophage                               | 171 | SRhi10006.GCCAAT.11232,SRhi10012.AGTTCC.11313,SRhi10006.GTTTC G.11389                                                                                                                                                                                                                                                                                                                                                                                                                                                                                                                                                                                                                                                                                                                                                                                                                         |
| immune        | mast cell                                | 168 | SRhi10008.GCCAAT.11487,SRhi10009.GCCAAT.11565,SRhi10014.AGTT C.11566,SRhi10008.GTTTCG.11567                                                                                                                                                                                                                                                                                                                                                                                                                                                                                                                                                                                                                                                                                                                                                                                                   |
| immune        | mast cell- stimulated sample             | 131 | SRhi10008.GCCAAT.11487                                                                                                                                                                                                                                                                                                                                                                                                                                                                                                                                                                                                                                                                                                                                                                                                                                                                        |
| immune        | mature alpha-beta T cell                 | 168 | SRhi10009.TTAGGC.11225,SRhi10009.CTTGTA.11306,SRhi10010.GTGAA A.11382,SRhi10010.TTAGGC.11226,SRhi10010.CTTGTA.11307,SRhi10011 .GTGAAA.11383                                                                                                                                                                                                                                                                                                                                                                                                                                                                                                                                                                                                                                                                                                                                                   |
| immune        | mesenchymal stem cell of the bone marrow | 168 | SRhi10003.CAGATC.11536,SRhi10010.GTTTCG.11697,SRhi10013.GGTA GC.11464                                                                                                                                                                                                                                                                                                                                                                                                                                                                                                                                                                                                                                                                                                                                                                                                                         |
| immune        | monocyte                                 | 168 | SRhi10008.TTAGGC.11224,SRhi10008.CTTGTA.11305,SRhi10009.GTGAA A.11381,SRhi10010.TGACCA.11229,SRhi10009.AGTCAA.11310,SRhi1000 9.GTGGCC.11386,SRhi10064.CAGATC.11857,SRhi10002.TGACCA.11227, SRhi10015.CTTGTA.11308,SRhi10002.GTGGCC.11384                                                                                                                                                                                                                                                                                                                                                                                                                                                                                                                                                                                                                                                      |
| immune        | mononuclear cell                         | 168 | SRhi10003.CCGTCC.11231,SRhi10005.CGTACG.11312,SRhi10005.ACTT GA.11388                                                                                                                                                                                                                                                                                                                                                                                                                                                                                                                                                                                                                                                                                                                                                                                                                         |
| immune        | myeloid leukocyte                        | 168 | SRhi10008.TTAGGC.11224,SRhi10008.CTTGTA.11305,SRhi10009.GTGAA A.11381,SRhi10010.TGACCA.11229,SRhi10009.AGTCAA.11310,SRhi1000 9.GTGGCC.11386,SRhi10064.CAGATC.11857,SRhi10002.TGACCA.11227, SRhi10015.CTTGTA.11308,SRhi10002.GTGGCC.11384,SRhi10006.GCCA AT.11232,SRhi10012.AGTTCC.11313,SRhi10006.GTTTCG.11389,SRhi100 08.GCCAAT.11487,SRhi10009.GCCAAT.11565,SRhi10014.AGTTCC.11566, SRhi10008.GTTTCG.11567,SRhi10012.ATGTCA.11233,SRhi10015.GTTTC G.11314,SRhi10013.CAGATC.11390                                                                                                                                                                                                                                                                                                                                                                                                            |
| immune        | natural killer cell                      | 168 | SRhi10010.ATGTCA.11230,SRhi10013.GTTTCG.11311,SRhi10011.CAGAT C.11387                                                                                                                                                                                                                                                                                                                                                                                                                                                                                                                                                                                                                                                                                                                                                                                                                         |
| immune        | neutrophil                               | 168 | SRhi10012.ATGTCA.11233,SRhi10015.GTTTCG.11314,SRhi10013.CAGAT C.11390                                                                                                                                                                                                                                                                                                                                                                                                                                                                                                                                                                                                                                                                                                                                                                                                                         |
| immune        | nongranular leukocyte                    | 168 | SRhi10008.TTAGGC.11224,SRhi10008.CTTGTA.11305,SRhi10009.GTGAA A.11381,SRhi10010.TGACCA.11229,SRhi10009.AGTCAA.11310,SRhi1000 9.GTGGCC.11386,SRhi10064.CAGATC.11857,SRhi10066.TAGCTT.11544,                                                                                                                                                                                                                                                                                                                                                                                                                                                                                                                                                                                                                                                                                                    |

|        |                                             |     |                                                                                                                                                                                                                                                                                                                                                                                                                                                                                                                                                                                                                                                                                                                                                                                                                                                                                                                                                                       |
|--------|---------------------------------------------|-----|-----------------------------------------------------------------------------------------------------------------------------------------------------------------------------------------------------------------------------------------------------------------------------------------------------------------------------------------------------------------------------------------------------------------------------------------------------------------------------------------------------------------------------------------------------------------------------------------------------------------------------------------------------------------------------------------------------------------------------------------------------------------------------------------------------------------------------------------------------------------------------------------------------------------------------------------------------------------------|
|        |                                             |     | SRhi10066.GGCTAC.11624,SRhi10066.CTTGTA.11705,SRhi10009.TTAGG C.11225,SRhi10009.CTTGTA.11306,SRhi10010.GTGAAA.11382,SRhi1001 0.TTAGGC.11226,SRhi10010.CTTGTA.11307,SRhi10011.GTGAAA.11383,S Rhi10002.TGACCA.11227,SRhi10015.CTTGTA.11308,SRhi10002.GTGGC C.11384,SRhi10010.ATGTCA.11230,SRhi10013.GTTTCG.11311,SRhi10011 .CAGATC.11387,SRhi10003.CCGTCC.11231,SRhi10005.CGTACG.11312,S Rhi10005.ACTTGA.11388,SRhi10084.CCGTCC.4534,SRhi10042.AGTCAA. 3997                                                                                                                                                                                                                                                                                                                                                                                                                                                                                                             |
| immune | phagocyte                                   | 168 | SRhi10064.CAGATC.11857,SRhi10006.GCCAAT.11232,SRhi10012.AGTTCC C.11313,SRhi10006.GTTTCG.11389                                                                                                                                                                                                                                                                                                                                                                                                                                                                                                                                                                                                                                                                                                                                                                                                                                                                         |
| joint  | synovial cell                               | 169 | SRhi10007.GTCCGC.11291,SRhi10004.GGTAGC.11368,SRhi10004.GGCT AC.11440                                                                                                                                                                                                                                                                                                                                                                                                                                                                                                                                                                                                                                                                                                                                                                                                                                                                                                 |
| kidney | epithelial cell of nephron                  | 168 | SRhi10002.GATCAG.11516,SRhi10011.CCGTCC.11517,SRhi10003.GATCA G.11597,SRhi10012.CCGTCC.11514,SRhi10004.GATCAG.11594,SRhi1001 4.CCGTCC.11515,SRhi10014.CGTACG.11595,SRhi10006.GATCAG.11676                                                                                                                                                                                                                                                                                                                                                                                                                                                                                                                                                                                                                                                                                                                                                                             |
| kidney | epithelial cell of proximal tubule          | 167 | SRhi10014.CCGTCC.11515,SRhi10014.CGTACG.11595,SRhi10006.GATC AG.11676                                                                                                                                                                                                                                                                                                                                                                                                                                                                                                                                                                                                                                                                                                                                                                                                                                                                                                 |
| kidney | glomerular endothelial cell                 | 157 | SRhi10012.CCGTCC.11514,SRhi10004.GATCAG.11594                                                                                                                                                                                                                                                                                                                                                                                                                                                                                                                                                                                                                                                                                                                                                                                                                                                                                                                         |
| kidney | human renal cortical epithelial cell sample | 168 | SRhi10002.GATCAG.11516,SRhi10014.CCGTCC.11515,SRhi10014.CGTA CG.11595,SRhi10006.GATCAG.11676                                                                                                                                                                                                                                                                                                                                                                                                                                                                                                                                                                                                                                                                                                                                                                                                                                                                          |
| kidney | mesangial cell                              | 157 | SRhi10013.CCGTCC.11518,SRhi10013.CGTACG.11598                                                                                                                                                                                                                                                                                                                                                                                                                                                                                                                                                                                                                                                                                                                                                                                                                                                                                                                         |
| kidney | nephron tubule epithelial cell              | 168 | SRhi10002.GATCAG.11516,SRhi10011.CCGTCC.11517,SRhi10003.GATCA G.11597,SRhi10014.CCGTCC.11515,SRhi10014.CGTACG.11595,SRhi1000 6.GATCAG.11676                                                                                                                                                                                                                                                                                                                                                                                                                                                                                                                                                                                                                                                                                                                                                                                                                           |
| kidney | renal cortical epithelial cell              | 168 | SRhi10002.GATCAG.11516,SRhi10012.CCGTCC.11514,SRhi10004.GATC AG.11594,SRhi10014.CCGTCC.11515,SRhi10014.CGTACG.11595,SRhi10 006.GATCAG.11676                                                                                                                                                                                                                                                                                                                                                                                                                                                                                                                                                                                                                                                                                                                                                                                                                           |
| liver  | endothelial cell of hepatic sinusoid        | 166 | SRhi10014.ACAGTG.11521,SRhi10008.AGTTCC.11601                                                                                                                                                                                                                                                                                                                                                                                                                                                                                                                                                                                                                                                                                                                                                                                                                                                                                                                         |
| liver  | hepatic mesenchymal stem cell               | 168 | SRhi10013.GCCAAT.11218,SRhi10004.CAGATC.11538                                                                                                                                                                                                                                                                                                                                                                                                                                                                                                                                                                                                                                                                                                                                                                                                                                                                                                                         |
| liver  | hepatic stellate cell                       | 163 | SRhi10015.ACAGTG.11524,SRhi10009.AGTTCC.11604                                                                                                                                                                                                                                                                                                                                                                                                                                                                                                                                                                                                                                                                                                                                                                                                                                                                                                                         |
| liver  | hepatocyte                                  | 168 | SRhi10066.AGTCAA.11523,SRhi10066.AGTTCC.11603,SRhi10066.ATGTC A.11684                                                                                                                                                                                                                                                                                                                                                                                                                                                                                                                                                                                                                                                                                                                                                                                                                                                                                                 |
| lung   | airway epithelial cell                      | 168 | SRhi10007.TTAGGC.11511,SRhi10007.CTTGTA.11591,SRhi10008.GTGAA A.11453,SRhi10007.GTAGAG.11256,SRhi10006.GAGTGG.11334,SRhi1001 4.GGTAGC.11406,SRhi10006.GGTAGC.11369,SRhi10005.CGATGT.11441                                                                                                                                                                                                                                                                                                                                                                                                                                                                                                                                                                                                                                                                                                                                                                             |
| lung   | bronchial epithelial cell                   | 168 | SRhi10007.TTAGGC.11511,SRhi10007.CTTGTA.11591,SRhi10008.GTGAA A.11453                                                                                                                                                                                                                                                                                                                                                                                                                                                                                                                                                                                                                                                                                                                                                                                                                                                                                                 |
| lung   | bronchial smooth muscle cell                | 198 | SRhi10004.TAGCTT.11512                                                                                                                                                                                                                                                                                                                                                                                                                                                                                                                                                                                                                                                                                                                                                                                                                                                                                                                                                |
| lung   | epithelial cell of tracheobronchial tree    | 168 | SRhi10007.TTAGGC.11511,SRhi10007.CTTGTA.11591,SRhi10008.GTGAA A.11453,SRhi10006.GGTAGC.11369,SRhi10005.CGATGT.11441                                                                                                                                                                                                                                                                                                                                                                                                                                                                                                                                                                                                                                                                                                                                                                                                                                                   |
| lung   | fibroblast of lung                          | 176 | SRhi10004.ACAGTG.11270,SRhi10015.AGTCAA.11347,SRhi10014.GTGG CC.11419                                                                                                                                                                                                                                                                                                                                                                                                                                                                                                                                                                                                                                                                                                                                                                                                                                                                                                 |
| lung   | fibroblast of pulmonary artery              | 91  | SRhi10008.ACAGTG.11250                                                                                                                                                                                                                                                                                                                                                                                                                                                                                                                                                                                                                                                                                                                                                                                                                                                                                                                                                |
| lung   | pneumocyte                                  | 168 | SRhi10015.CGATGT.11510,SRhi10002.CTTGTA.11590,SRhi10004.GTGAA A.11671                                                                                                                                                                                                                                                                                                                                                                                                                                                                                                                                                                                                                                                                                                                                                                                                                                                                                                 |
| lung   | smooth muscle cell of the pulmonary artery  | 168 | SRhi10003.GTCCGC.11288,SRhi10015.GAGTGG.11365,SRhi10011.TAGC TT.11437                                                                                                                                                                                                                                                                                                                                                                                                                                                                                                                                                                                                                                                                                                                                                                                                                                                                                                 |
| lung   | smooth muscle cell of trachea               | 158 | SRhi10013.TAGCTT.11513                                                                                                                                                                                                                                                                                                                                                                                                                                                                                                                                                                                                                                                                                                                                                                                                                                                                                                                                                |
| lung   | tracheal epithelial cell                    | 168 | SRhi10006.GGTAGC.11369,SRhi10005.CGATGT.11441                                                                                                                                                                                                                                                                                                                                                                                                                                                                                                                                                                                                                                                                                                                                                                                                                                                                                                                         |
| muscle | cell of skeletal muscle                     | 168 | SRhi10005.GTAGAG.11281,SRhi10004.GAGTGG.11358,SRhi10012.GATC AG.11430,SRhi10006.GTAGAG.11240,SRhi10005.GAGTGG.11321,SRhi10 013.GATCAG.11397,SRhi10004.GTAGAG.11282,SRhi10003.GAGTGG.113 59                                                                                                                                                                                                                                                                                                                                                                                                                                                                                                                                                                                                                                                                                                                                                                            |
| muscle | muscle cell                                 | 168 | SRhi10004.GTAGAG.11282,SRhi10003.GAGTGG.11359,SRhi10009.GTAG AG.11210,SRhi10008.GTAGAG.11283,SRhi10007.GAGTGG.11360,SRhi10 010.GTAGAG.11284,SRhi10008.GAGTGG.11361,SRhi10002.TAGCTT.1143 3,SRhi10011.GTAGAG.11234,SRhi10009.GAGTGG.11315,SRhi10003.TAG CTT.11391,SRhi10004.TAGCTT.11512,SRhi10012.GTAGAG.11285,SRhi100 10.GAGTGG.11362,SRhi10013.GTAGAG.11239,SRhi10011.GAGTGG.1132 0,SRhi10006.TAGCTT.11396,SRhi10014.GTAGAG.11286,SRhi10012.GAGT GG.11363,SRhi10007.TAGCTT.11435,SRhi10008.TAGCTT.11508,SRhi1001 5.GTAGAG.11287,SRhi10013.GAGTGG.11364,SRhi10009.TAGCTT.11436, SRhi10002.GTCCGC.11257,SRhi10014.GAGTGG.11335,SRhi10010.TAGC TT.11465,SRhi10003.GTCCGC.11288,SRhi10015.GAGTGG.11365,SRhi100 11.TAGCTT.11437,SRhi10004.GTCCGC.11289,SRhi10002.GGTAGC.11366 ,SRhi10012.TAGCTT.11438,SRhi10013.TAGCTT.11513,SRhi10015.TAGCT T.11212,SRhi10005.GTCCGC.11290,SRhi10003.GGTAGC.11367,SRhi1001 4.TAGCTT.11439,SRhi10006.GTCCGC.11258,SRhi10002.GGCTAC.11466 |
| muscle | muscle precursor cell                       | 168 | SRhi10009.ATGTCA.11241,SRhi10012.GTTTCG.11322,SRhi10010.CAGAT C.11398,SRhi10006.GTAGAG.11240,SRhi10005.GAGTGG.11321,SRhi100 13.GATCAG.11397                                                                                                                                                                                                                                                                                                                                                                                                                                                                                                                                                                                                                                                                                                                                                                                                                           |
| muscle | myotube                                     | 170 | SRhi10004.GTAGAG.11282,SRhi10003.GAGTGG.11359                                                                                                                                                                                                                                                                                                                                                                                                                                                                                                                                                                                                                                                                                                                                                                                                                                                                                                                         |

|        |                                   |     |                                                                                                                                                                                                                                                                                                                                                                                                                                                                                                                                                                                                                                                                                                                                                                                                                                                                                                                                                                                                                                                                                                                                                                                                                                                                                                                                                                                                                                                                                                                                                                                                                                                                                                                                                                                                                                                                                                                                                                                                                                                                                                                                                                                                                                                                                                                                                                                                                                                                                                                                                                                     |
|--------|-----------------------------------|-----|-------------------------------------------------------------------------------------------------------------------------------------------------------------------------------------------------------------------------------------------------------------------------------------------------------------------------------------------------------------------------------------------------------------------------------------------------------------------------------------------------------------------------------------------------------------------------------------------------------------------------------------------------------------------------------------------------------------------------------------------------------------------------------------------------------------------------------------------------------------------------------------------------------------------------------------------------------------------------------------------------------------------------------------------------------------------------------------------------------------------------------------------------------------------------------------------------------------------------------------------------------------------------------------------------------------------------------------------------------------------------------------------------------------------------------------------------------------------------------------------------------------------------------------------------------------------------------------------------------------------------------------------------------------------------------------------------------------------------------------------------------------------------------------------------------------------------------------------------------------------------------------------------------------------------------------------------------------------------------------------------------------------------------------------------------------------------------------------------------------------------------------------------------------------------------------------------------------------------------------------------------------------------------------------------------------------------------------------------------------------------------------------------------------------------------------------------------------------------------------------------------------------------------------------------------------------------------------|
| muscle | skeletal muscle myoblast          | 165 | SRhi10009.ATGTCA.11241,SRhi10012.GTTTCG.11322,SRhi10010.CAGATC.11398                                                                                                                                                                                                                                                                                                                                                                                                                                                                                                                                                                                                                                                                                                                                                                                                                                                                                                                                                                                                                                                                                                                                                                                                                                                                                                                                                                                                                                                                                                                                                                                                                                                                                                                                                                                                                                                                                                                                                                                                                                                                                                                                                                                                                                                                                                                                                                                                                                                                                                                |
| muscle | skeletal muscle satellite cell    | 167 | SRhi10006.GTAGAG.11240,SRhi10005.GAGTGG.11321,SRhi10013.GATCAG.11397                                                                                                                                                                                                                                                                                                                                                                                                                                                                                                                                                                                                                                                                                                                                                                                                                                                                                                                                                                                                                                                                                                                                                                                                                                                                                                                                                                                                                                                                                                                                                                                                                                                                                                                                                                                                                                                                                                                                                                                                                                                                                                                                                                                                                                                                                                                                                                                                                                                                                                                |
| muscle | smooth muscle cell of colon       | 166 | SRhi10013.GTAGAG.11239,SRhi10011.GAGTGG.11320,SRhi10006.TAGCTT.11396                                                                                                                                                                                                                                                                                                                                                                                                                                                                                                                                                                                                                                                                                                                                                                                                                                                                                                                                                                                                                                                                                                                                                                                                                                                                                                                                                                                                                                                                                                                                                                                                                                                                                                                                                                                                                                                                                                                                                                                                                                                                                                                                                                                                                                                                                                                                                                                                                                                                                                                |
| muscle | smooth muscle cell sample         | 168 | SRhi10009.GTAGAG.11210,SRhi10008.GTAGAG.11283,SRhi10007.GAGTGG.11360,SRhi10010.GTAGAG.11284,SRhi10008.GAGTGG.11361,SRhi10002.TAGCTT.11433,SRhi10011.GTAGAG.11234,SRhi10009.GAGTGG.11315,SRhi10003.TAGCTT.11391,SRhi10012.GTAGAG.11285,SRhi10010.GAGTGG.11362,SRhi10014.GTAGAG.11286,SRhi10012.GAGTGG.11363,SRhi10007.TAGCTT.11435,SRhi10008.TAGCTT.11508,SRhi10015.GTAGAG.11287,SRhi10013.GAGTGG.11364,SRhi10009.TAGCTT.11436,SRhi10002.GTCCGC.11257,SRhi10014.GAGTGG.11335,SRhi10010.TAGCTT.11465,SRhi10003.GTCCGC.11288,SRhi10015.GAGTGG.11365,SRhi10011.TAGCTT.11437,SRhi10004.GTCCGC.11289,SRhi10002.GGTAGC.11366,SRhi10012.TAGCTT.11438,SRhi10013.TAGCTT.11513,SRhi10005.GTCCGC.11290,SRhi10006.GTCCGC.11258,SRhi10002.GGTAC.11466                                                                                                                                                                                                                                                                                                                                                                                                                                                                                                                                                                                                                                                                                                                                                                                                                                                                                                                                                                                                                                                                                                                                                                                                                                                                                                                                                                                                                                                                                                                                                                                                                                                                                                                                                                                                                                             |
| others | adult endothelial progenitor cell | 168 | SRhi10010.TGACCA.11229,SRhi10009.AGTCAA.11310,SRhi10009.GTGGCC.11386                                                                                                                                                                                                                                                                                                                                                                                                                                                                                                                                                                                                                                                                                                                                                                                                                                                                                                                                                                                                                                                                                                                                                                                                                                                                                                                                                                                                                                                                                                                                                                                                                                                                                                                                                                                                                                                                                                                                                                                                                                                                                                                                                                                                                                                                                                                                                                                                                                                                                                                |
| others | columnar/cuboidal epithelial cell | 168 | SRhi10014.TTAGGC.11242,SRhi10013.CTTGTA.11323,SRhi10014.GTGAA A.11399,SRhi10014.CCGTCC.11515,SRhi10014.CGTACG.11595,SRhi10006.GATCAG.11676                                                                                                                                                                                                                                                                                                                                                                                                                                                                                                                                                                                                                                                                                                                                                                                                                                                                                                                                                                                                                                                                                                                                                                                                                                                                                                                                                                                                                                                                                                                                                                                                                                                                                                                                                                                                                                                                                                                                                                                                                                                                                                                                                                                                                                                                                                                                                                                                                                          |
| others | connective tissue cell            | 168 | SRhi10011.CGATGT.11376,SRhi10013.GGTAC.11327,SRhi10012.CGATG T.11473,SRhi10014.GGTAC.11474,SRhi10002.GTGAAA.11475,SRhi10013.CGATGT.11476,SRhi10014.CGATGT.11259,SRhi10015.GGTAC.11336,SRhi10003.GTGAAA.11408,SRhi10004.TTAGGC.11248,SRhi10004.CTTGTA.11463,SRhi10010.TGACCA.11229,SRhi10009.AGTCAA.11310,SRhi10009.GTGGCC.11386,SRhi10011.TTAGGC.11261,SRhi10011.CTTGTA.11338,SRhi10012.GTGAAA.11410,SRhi10012.TTAGGC.11262,SRhi10012.CTTGTA.11339,SRhi10013.GTGAAA.11411,SRhi10012.TGACCA.11245,SRhi10011.AGTCAA.11326,SRhi10012.GGTAGC.11401,SRhi10013.TGACCA.11268,SRhi10012.AGTCAA.11345,SRhi10011.GTGGCC.11417,SRhi10014.TGACCA.11492,SRhi10015.TGACCA.11531,SRhi10002.ACAGTG.11269,SRhi10013.AGTCAA.11346,SRhi10012.GTGGCC.11418,SRhi10003.ACAGTG.11237,SRhi10014.AGTCAA.11318,SRhi10013.GTGGCC.11394,SRhi10004.ACAGTG.11270,SRhi10015.AGTCAA.11347,SRhi10014.GTGGCC.11419,SRhi10005.ACAGTG.11506,SRhi10002.AGTTCC.11586,SRhi10015.GTGGCC.11667,SRhi10006.ACAGTG.11540,SRhi10003.AGTTCC.11620,SRhi10002.GTTTCG.11701,SRhi10007.ACAGTG.11238,SRhi10004.AGTTCC.11319,SRhi10003.GTTTCG.11395,SRhi10008.ACAGTG.11250,SRhi10010.ACAGTG.11535,SRhi10013.ACAGTG.11271,SRhi10007.AGTTCC.11348,SRhi10004.GTTTCG.11420,SRhi10015.ACAGTG.11524,SRhi10009.AGTTCC.11604,SRhi10005.GCCAAT.11527,SRhi10011.AGTTCC.11607,SRhi10011.GCCAAT.11493,SRhi10002.ATGTCA.11573,SRhi10006.CAGATC.11219,SRhi10007.CAGATC.11548,SRhi10012.GCCAAT.11217,SRhi10015.GCCAAT.11537,SRhi10003.ATGTCA.11617,SRhi10002.CAGATC.11547,SRhi10004.ATGTCA.11627,SRhi10003.CAGATC.11536,SRhi10010.GTTTCG.11697,SRhi10013.GGTAGC.11464,SRhi10013.GCCAAT.11218,SRhi10004.CAGATC.11538,SRhi10014.GCCAAT.11214,SRhi10005.CAGATC.11539,SRhi10006.ATGTCA.11619,SRhi10011.GTTTCG.11700,SRhi10008.ATGTCA.11549,SRhi10009.CAGATC.11629,SRhi10013.ATGTCA.11252,SRhi10014.CAGATC.11462,SRhi10014.AGTCA.11276,SRhi10003.CGTACG.11353,SRhi10015.CAGATC.11425,SRhi10015.ATGTCA.11277,SRhi10004.CGTACG.11354,SRhi10002.ACTTGA.11426,SRhi10003.ACTTGA.11249,SRhi10002.CCGTCC.11491,SRhi10004.ACTTGA.11652,SRhi10007.CGTACG.11328,SRhi10006.CCGTCC.11468,SRhi10008.CGTACG.11329,SRhi10010.ACTTGA.11403,SRhi10011.ACTTGA.11469,SRhi10007.CCGTCC.11279,SRhi10009.CGTACG.11356,SRhi10012.ACTTGA.11428,SRhi10008.CCGTCC.11280,SRhi10010.CGTACG.11357,SRhi10013.ACTTGA.11429,SRhi10010.CCGTCC.11254,SRhi10012.CGTACG.11332,SRhi10003.CGATGT.11405,SRhi10013.CCGTCC.11518,SRhi10013.CGTACG.11598,SRhi10007.GTCCGC.11291,SRhi10004.GGTAGC.11368,SRhi10004.GGTAC.11440,SRhi10003.TTAGGC.12237,SRhi10013.TTAGGC.12240,SRhi10042.GAGTGG.3952+3953 |
| others | contractile cell                  | 168 | SRhi10002.CCGTCC.11491,SRhi10004.ACTTGA.11652,SRhi10013.CCGTCC.11518,SRhi10013.CGTACG.11598,SRhi10004.GTAGAG.11282,SRhi10003.GAGTGG.11359,SRhi10009.GTAGAG.11210,SRhi10008.GTAGAG.11283,SRhi10007.GAGTGG.11360,SRhi10010.GTAGAG.11284,SRhi10008.GAGTGG.11361,SRhi10002.TAGCTT.11433,SRhi10011.GTAGAG.11234,SRhi10009.GAGTGG.11315,SRhi10003.TAGCTT.11391,SRhi10004.TAGCTT.11512,SRhi10012.GTAGAG.11285,SRhi10010.GAGTGG.11362,SRhi10013.GTAGAG.11239,SRhi10011.GAGTGG.11320,SRhi10006.TAGCTT.11396,SRhi10014.GTAGAG.11286,SRhi10012.GAGTGG.11363,SRhi10007.TAGCTT.11435,SRhi10008.TAGCTT.11508,SRhi10015.GTAGAG.11287,SRhi10013.GAGTGG.11364,SRhi10009.TAGCTT.11436,SRhi10002.GTCCGC.11257,SRhi10014.GAGTGG.11335,SRhi10010.TAGCTT.11465,SRhi10003.GTCCGC.11288,SRhi10015.GAGTGG.11365,SRhi10011.TAGCTT.11437,SRhi10004.GTCCGC.11289,SRhi10002.GGTAGC.11366,SRhi10012.TAGCTT.11438,SRhi10013.TAGCTT.11513,SRhi10015.TAGCTT.11212,SRhi10005.GTCCGC.11290,SRhi10003.GGTAGC.11367,SRhi10014.TAGCTT.11439,SRhi10006.GTCCGC                                                                                                                                                                                                                                                                                                                                                                                                                                                                                                                                                                                                                                                                                                                                                                                                                                                                                                                                                                                                                                                                                                                                                                                                                                                                                                                                                                                                                                                                                                                                                              |

C.11258,SRhi10002.GGCTAC.11466

|        |                              |     |                                                                                                                                                                                                                                                                                                                                                                                                                                                                                                                                                                                                                                                                                                                                                                                                                                                                                                                                                                                                                                                                                                                                                                                                                                                                                                                                                                                                                                                                                                                                                                                                                                                                                                                                                                                                                                                                                                                                                                                                                                                                                                                                                                 |
|--------|------------------------------|-----|-----------------------------------------------------------------------------------------------------------------------------------------------------------------------------------------------------------------------------------------------------------------------------------------------------------------------------------------------------------------------------------------------------------------------------------------------------------------------------------------------------------------------------------------------------------------------------------------------------------------------------------------------------------------------------------------------------------------------------------------------------------------------------------------------------------------------------------------------------------------------------------------------------------------------------------------------------------------------------------------------------------------------------------------------------------------------------------------------------------------------------------------------------------------------------------------------------------------------------------------------------------------------------------------------------------------------------------------------------------------------------------------------------------------------------------------------------------------------------------------------------------------------------------------------------------------------------------------------------------------------------------------------------------------------------------------------------------------------------------------------------------------------------------------------------------------------------------------------------------------------------------------------------------------------------------------------------------------------------------------------------------------------------------------------------------------------------------------------------------------------------------------------------------------|
| others | ecto-epithelial cell         | 168 | SRhi10014.TTAGGC.11242,SRhi10013.CTTGTA.11323,SRhi10014.GTGAA A.11399,SRhi10015.TTAGGC.11526,SRhi10014.CTTGTA.11606,SRhi10015 .GTGAAA.11687,SRhi10003.GCCAAT.11272,SRhi10010.AGTTCC.11349,S Rhi10005.GTTTCG.11421,SRhi10004.GCCAAT.11251,SRhi10002.GTAGAG .11220,SRhi10002.GAGTGG.11301,SRhi10009.GATCAG.11378                                                                                                                                                                                                                                                                                                                                                                                                                                                                                                                                                                                                                                                                                                                                                                                                                                                                                                                                                                                                                                                                                                                                                                                                                                                                                                                                                                                                                                                                                                                                                                                                                                                                                                                                                                                                                                                  |
| others | endo-epithelial cell         | 168 | SRhi10007.TTAGGC.11511,SRhi10007.CTTGTA.11591,SRhi10008.GTGAA A.11453,SRhi10011.TGACCA.11507,SRhi10010.AGTCAA.11587,SRhi1001 1.ACAGTG.11302,SRhi10006.AGTTCC.11379,SRhi10002.GCCAAT.11246, SRhi10004.GCCAAT.11251,SRhi10009.CCGTCC.11253,SRhi10011.CGTAC G.11331,SRhi10014.ACTTGA.11404,SRhi10007.GTAGAG.11256,SRhi1000 6.GAGTGG.11334,SRhi10014.GGTAGC.11406,SRhi10006.GGTAGC.11369 ,SRhi10005.CGATGT.11441                                                                                                                                                                                                                                                                                                                                                                                                                                                                                                                                                                                                                                                                                                                                                                                                                                                                                                                                                                                                                                                                                                                                                                                                                                                                                                                                                                                                                                                                                                                                                                                                                                                                                                                                                    |
| others | endothelial cell             | 168 | SRhi10003.TGACCA.11207,SRhi10002.AGTCAA.11263,SRhi10003.GTGG CC.11340,SRhi10011.GGTAGC.11412,SRhi10004.TGACCA.11264,SRhi100 03.AGTCAA.11341,SRhi10004.GTGGCC.11413,SRhi10005.TGACCA.1123 6,SRhi10004.AGTCAA.11317,SRhi10005.GTGGCC.11393,SRhi10006.TGA CCA.11265,SRhi10006.GTGGCC.11414,SRhi10007.TGACCA.11266,SRhi1 0006.AGTCAA.11343,SRhi10008.TGACCA.11243,SRhi10007.AGTCAA.113 24,SRhi10007.GTGGCC.11400,SRhi10009.TGACCA.11267,SRhi10008.AG TCAA.11344,SRhi10008.GTGGCC.11416,SRhi10014.ACAGTG.11521,SRhi 10008.AGTTCC.11601,SRhi10012.CCGTCC.11514,SRhi10004.GATCAG.11 594,SRhi10008.GTCCGC.11532,SRhi10005.GGTAGC.11612                                                                                                                                                                                                                                                                                                                                                                                                                                                                                                                                                                                                                                                                                                                                                                                                                                                                                                                                                                                                                                                                                                                                                                                                                                                                                                                                                                                                                                                                                                                                  |
| others | epidermal cell               | 168 | SRhi10003.GCCAAT.11272,SRhi10010.AGTTCC.11349,SRhi10005.GTTTC G.11421,SRhi10002.GTAGAG.11220,SRhi10002.GAGTGG.11301,SRhi100 09.GATCAG.11378                                                                                                                                                                                                                                                                                                                                                                                                                                                                                                                                                                                                                                                                                                                                                                                                                                                                                                                                                                                                                                                                                                                                                                                                                                                                                                                                                                                                                                                                                                                                                                                                                                                                                                                                                                                                                                                                                                                                                                                                                     |
| others | epithelial cell              | 168 | SRhi10015.CGATGT.11510,SRhi10002.CTTGTA.11590,SRhi10004.GTGAA A.11671,SRhi10002.TTAGGC.11533,SRhi10003.CTTGTA.11613,SRhi10005 .GTGAAA.11694,SRhi10007.TTAGGC.11511,SRhi10007.CTTGTA.11591,S Rhi10008.GTGAAA.11453,SRhi10014.TTAGGC.11242,SRhi10013.CTTGTA .11323,SRhi10014.GTGAAA.11399,SRhi10015.TTAGGC.11526,SRhi10014. CTTGTA.11606,SRhi10015.GTGAAA.11687,SRhi10003.TGACCA.11207,SR hi10002.AGTCAA.11263,SRhi10003.GTGGCC.11340,SRhi10011.GGTAGC. 11412,SRhi10004.TGACCA.11264,SRhi10003.AGTCAA.11341,SRhi10004. GTGGCC.11413,SRhi10005.TGACCA.11236,SRhi10004.AGTCAA.11317,S Rhi10005.GTGGCC.11393,SRhi10006.TGACCA.11265,SRhi10006.GTGGC C.11414,SRhi10007.TGACCA.11266,SRhi10006.AGTCAA.11343,SRhi1000 8.TGACCA.11243,SRhi10007.AGTCAA.11324,SRhi10007.GTGGCC.11400, SRhi10009.TGACCA.11267,SRhi10008.AGTCAA.11344,SRhi10008.GTGG CC.11416,SRhi10011.TGACCA.11507,SRhi10010.AGTCAA.11587,SRhi100 11.ACAGTG.11302,SRhi10006.AGTTCC.11379,SRhi10014.ACAGTG.11521 ,SRhi10008.AGTTCC.11601,SRhi10066.AGTCAA.11523,SRhi10066.AGTT CC.11603,SRhi10066.ATGTCA.11684,SRhi10002.GCCAAT.11246,SRhi100 03.GCCAAT.11272,SRhi10010.AGTTCC.11349,SRhi10005.GTTTCG.11421, SRhi10004.GCCAAT.11251,SRhi10007.GCCAAT.11273,SRhi10013.AGTTCC .11350,SRhi10007.GTTTCG.11422,SRhi10008.CAGATC.11247,SRhi1000 7.ATGTCA.11402,SRhi10004.CCGTCC.11278,SRhi10006.CGTAGC.11355, SRhi10008.ACTTGA.11427,SRhi10009.CCGTCC.11253,SRhi10011.CGTAC G.11331,SRhi10014.ACTTGA.11404,SRhi10002.GATCAG.11516,SRhi1001 1.CCGTCC.11517,SRhi10003.GATCAG.11597,SRhi10012.CCGTCC.11514, SRhi10004.GATCAG.11594,SRhi10014.CCGTCC.11515,SRhi10014.CGTA CG.11595,SRhi10006.GATCAG.11676,SRhi10015.CCGTCC.11215,SRhi10 015.CGTACG.11528,SRhi10007.GATCAG.11608,SRhi10002.GTAGAG.1122 0,SRhi10002.GAGTGG.11301,SRhi10009.GATCAG.11378,SRhi10003.GTA GAG.11255,SRhi10010.GATCAG.11333,SRhi10007.GTAGAG.11256,SRhi1 0006.GAGTGG.11334,SRhi10014.GGTAGC.11406,SRhi10007.GTCCGC.11 291,SRhi10004.GGTAGC.11368,SRhi10004.GGCTAC.11440,SRhi10008.G TCCGC.11532,SRhi10005.GGTAGC.11612,SRhi10006.GGTAGC.11369,SR hi10005.CGATGT.11441,SRhi10009.GGCTAC.11216,SRhi10013.GTCCGC. 11520,SRhi10010.GGTAGC.11600 |
| others | exocrine cell                | 168 | SRhi10015.ACAGTG.11524,SRhi10009.AGTTCC.11604,SRhi10002.GTAG AG.11220,SRhi10002.GAGTGG.11301,SRhi10009.GATCAG.11378                                                                                                                                                                                                                                                                                                                                                                                                                                                                                                                                                                                                                                                                                                                                                                                                                                                                                                                                                                                                                                                                                                                                                                                                                                                                                                                                                                                                                                                                                                                                                                                                                                                                                                                                                                                                                                                                                                                                                                                                                                             |
| others | extracellular secreting cell | 168 | SRhi10011.TTAGGC.11261,SRhi10011.CTTGTA.11338,SRhi10012.GTGAA A.11410,SRhi10012.TTAGGC.11262,SRhi10012.CTTGTA.11339,SRhi10013 .GTGAAA.11411,SRhi10015.ACAGTG.11524,SRhi10009.AGTTCC.11604,S Rhi10011.GCCAAT.11493,SRhi10002.ATGTCA.11573,SRhi10007.GTCCGC .11291,SRhi10004.GGTAGC.11368,SRhi10004.GGCTAC.11440                                                                                                                                                                                                                                                                                                                                                                                                                                                                                                                                                                                                                                                                                                                                                                                                                                                                                                                                                                                                                                                                                                                                                                                                                                                                                                                                                                                                                                                                                                                                                                                                                                                                                                                                                                                                                                                  |
| others | fibroblast                   | 168 | SRhi10012.TGACCA.11245,SRhi10011.AGTCAA.11326,SRhi10012.GGTA GC.11401,SRhi10013.TGACCA.11268,SRhi10012.AGTCAA.11345,SRhi100 11.GTGGCC.11417,SRhi10014.TGACCA.11492,SRhi10015.TGACCA.1153 1,SRhi10002.ACAGTG.11269,SRhi10013.AGTCAA.11346,SRhi10012.GTG GCC.11418,SRhi10003.ACAGTG.11237,SRhi10014.AGTCAA.11318,SRhi1 0013.GTGGCC.11394,SRhi10004.ACAGTG.11270,SRhi10015.AGTCAA.11 347,SRhi10014.GTGGCC.11419,SRhi10005.ACAGTG.11506,SRhi10002.A GTTCC.11586,SRhi10015.GTGGCC.11667,SRhi10006.ACAGTG.11540,SR hi10003.AGTTCC.11620,SRhi10002.GTTTCG.11701,SRhi10007.ACAGTG. 11238,SRhi10004.AGTTCC.11319,SRhi10003.GTTTCG.11395,SRhi10008. ACAGTG.11250,SRhi10010.ACAGTG.11535,SRhi10015.ACAGTG.11524,S Rhi10009.AGTTCC.11604,SRhi10005.GCCAAT.11527,SRhi10011.AGTTCC .11607,SRhi10007.CGTAGC.11328,SRhi10006.CCGTCC.11468,SRhi10008                                                                                                                                                                                                                                                                                                                                                                                                                                                                                                                                                                                                                                                                                                                                                                                                                                                                                                                                                                                                                                                                                                                                                                                                                                                                                                                             |

|        |                                      |     |                                                                                                                                                                                                                                                                                                                                                                                                                                                                                                                                                                                                                                                                                                                                                                                                    |
|--------|--------------------------------------|-----|----------------------------------------------------------------------------------------------------------------------------------------------------------------------------------------------------------------------------------------------------------------------------------------------------------------------------------------------------------------------------------------------------------------------------------------------------------------------------------------------------------------------------------------------------------------------------------------------------------------------------------------------------------------------------------------------------------------------------------------------------------------------------------------------------|
|        |                                      |     | .CGTACG.11329,SRhi10010.ACTTGA.11403,SRhi10011.ACTTGA.11469,SRhi10007.CCGTCC.11279,SRhi10009.CGTACG.11356,SRhi10012.ACTTGA.11428,SRhi10008.CCGTCC.11280,SRhi10010.CGTACG.11357,SRhi10013.ACTTGA.11429,SRhi10042.GAGTGG.3952+3953                                                                                                                                                                                                                                                                                                                                                                                                                                                                                                                                                                   |
| others | GAG secreting cell                   | 168 | SRhi10011.TTAGGC.11261,SRhi10011.CTTGTA.11338,SRhi10012.GTGAA A.11410,SRhi10012.TTAGGC.11262,SRhi10012.CTTGTA.11339,SRhi10013 .GTGAAA.11411,SRhi10007.GTCCGC.11291,SRhi10004.GGTAGC.11368,SRhi10004.GGCTAC.11440                                                                                                                                                                                                                                                                                                                                                                                                                                                                                                                                                                                   |
| others | general ecto-epithelial cell         | 168 | SRhi10015.TTAGGC.11526,SRhi10014.CTTGTA.11606,SRhi10015.GTGAA A.11687,SRhi10003.GCCAAT.11272,SRhi10010.AGTTCC.11349,SRhi1000 5.GTTTCG.11421,SRhi10002.GTAGAG.11220,SRhi10002.GAGTGG.11301, SRhi10009.GATCAG.11378                                                                                                                                                                                                                                                                                                                                                                                                                                                                                                                                                                                  |
| others | iPS                                  | 168 | SRhi10043.GTGAAA.4080+4081,SRhi10043.GTTTCG.4084,SRhi10043.GT AGAG.4082+4083                                                                                                                                                                                                                                                                                                                                                                                                                                                                                                                                                                                                                                                                                                                       |
| others | keratinizing epithelial cell barrier | 169 | SRhi10003.GCCAAT.11272,SRhi10010.AGTTCC.11349,SRhi10005.GTTTC G.11421,SRhi10004.GCCAAT.11251                                                                                                                                                                                                                                                                                                                                                                                                                                                                                                                                                                                                                                                                                                       |
| others | lining cell                          | 168 | SRhi10003.TGACCA.11207,SRhi10002.AGTCAA.11263,SRhi10003.GTGG CC.11340,SRhi10011.GGTAGC.11412,SRhi10004.TGACCA.11264,SRhi100 03.AGTCAA.11341,SRhi10004.GTGGCC.11413,SRhi10005.TGACCA.1123 6,SRhi10004.AGTCAA.11317,SRhi10005.GTGGCC.11393,SRhi10006.TGA CCA.11265,SRhi10006.GTGGCC.11414,SRhi10007.TGACCA.11266,SRhi1 0006.AGTCAA.11343,SRhi10008.TGACCA.11243,SRhi10007.AGTCAA.113 24,SRhi10007.GTGGCC.11400,SRhi10009.TGACCA.11267,SRhi10008.AG TCAA.11344,SRhi10008.GTGGCC.11416,SRhi10014.ACAGTG.11521,SRhi 10008.AGTTCC.11601,SRhi10008.CAGATC.11247,SRhi10007.ATGTCA.11 402,SRhi10012.CCGTCC.11514,SRhi10004.GATCAG.11594,SRhi10003.G TAGAG.11255,SRhi10010.GATCAG.11333,SRhi10007.GTCCGC.11291,SR hi10004.GGTAGC.11368,SRhi10004.GGCTAC.11440,SRhi10008.GTCCGC. 11532,SRhi10005.GGTAGC.11612 |
| others | mesenchymal stem cell                | 168 | SRhi10010.TGACCA.11229,SRhi10009.AGTCAA.11310,SRhi10009.GTGG CC.11386,SRhi10013.ACAGTG.11271,SRhi10007.AGTTCC.11348,SRhi100 04.GTTTCG.11420,SRhi10006.CAGATC.11219,SRhi10007.CAGATC.11548, SRhi10012.GCCAAT.11217,SRhi10015.GCCAAT.11537,SRhi10003.ATGTC A.11617,SRhi10002.CAGATC.11547,SRhi10004.ATGTCA.11627,SRhi10003 .CAGATC.11536,SRhi10010.GTTTCG.11697,SRhi10013.GGTAGC.11464,SR hi10013.GCCAAT.11218,SRhi10004.CAGATC.11538,SRhi10014.GCCAAT. 11214,SRhi10005.CAGATC.11539,SRhi10006.ATGTCA.11619,SRhi10011. GTTTCG.11700,SRhi10008.ATGTCA.11549,SRhi10009.CAGATC.11629,SR hi10003.TTAGGC.12237,SRhi10013.TTAGGC.12240                                                                                                                                                                     |
| others | meso-epithelial cell                 | 168 | SRhi10003.TGACCA.11207,SRhi10002.AGTCAA.11263,SRhi10003.GTGG CC.11340,SRhi10011.GGTAGC.11412,SRhi10004.TGACCA.11264,SRhi100 03.AGTCAA.11341,SRhi10004.GTGGCC.11413,SRhi10005.TGACCA.1123 6,SRhi10004.AGTCAA.11317,SRhi10005.GTGGCC.11393,SRhi10006.TGA CCA.11265,SRhi10006.GTGGCC.11414,SRhi10007.TGACCA.11266,SRhi1 0006.AGTCAA.11343,SRhi10008.TGACCA.11243,SRhi10007.AGTCAA.113 24,SRhi10007.GTGGCC.11400,SRhi10009.TGACCA.11267,SRhi10008.AG TCAA.11344,SRhi10008.GTGGCC.11416,SRhi10014.ACAGTG.11521,SRhi 10008.AGTTCC.11601,SRhi10012.CCGTCC.11514,SRhi10004.GATCAG.11 594,SRhi10014.CCGTCC.11515,SRhi10014.CGTACG.11595,SRhi10006.G ATCAG.11676,SRhi10007.GTCCGC.11291,SRhi10004.GGTAGC.11368,SR hi10004.GGCTAC.11440,SRhi10008.GTCCGC.11532,SRhi10005.GGTAGC. 11612                        |
| others | mesothelial cell                     | 168 | SRhi10008.CAGATC.11247,SRhi10007.ATGTCA.11402,SRhi10003.GTAGA G.11255,SRhi10010.GATCAG.11333                                                                                                                                                                                                                                                                                                                                                                                                                                                                                                                                                                                                                                                                                                       |
| others | multi fate stem cell                 | 168 | SRhi10010.TGACCA.11229,SRhi10009.AGTCAA.11310,SRhi10009.GTGG CC.11386,SRhi10013.ACAGTG.11271,SRhi10007.AGTTCC.11348,SRhi100 04.GTTTCG.11420,SRhi10006.CAGATC.11219,SRhi10007.CAGATC.11548, SRhi10012.GCCAAT.11217,SRhi10015.GCCAAT.11537,SRhi10003.ATGTC A.11617,SRhi10002.CAGATC.11547,SRhi10004.ATGTCA.11627,SRhi10003 .CAGATC.11536,SRhi10010.GTTTCG.11697,SRhi10013.GGTAGC.11464,SR hi10013.GCCAAT.11218,SRhi10004.CAGATC.11538,SRhi10014.GCCAAT. 11214,SRhi10005.CAGATC.11539,SRhi10006.ATGTCA.11619,SRhi10011. GTTTCG.11700,SRhi10008.ATGTCA.11549,SRhi10009.CAGATC.11629,SR hi10014.GTTTCG.11352,SRhi10012.CAGATC.11424,SRhi10003.TTAGGC. 12237,SRhi10013.TTAGGC.12240                                                                                                                      |
| others | non-terminally differentiated cell   | 168 | SRhi10009.ATGTCA.11241,SRhi10012.GTTTCG.11322,SRhi10010.CAGAT C.11398,SRhi10014.ATGTCA.11276,SRhi10003.CGTACG.11353,SRhi1001 5.CAGATC.11425,SRhi10015.ATGTCA.11277,SRhi10004.CGTACG.11354, SRhi10002.ACTTGA.11426,SRhi10006.GTAGAG.11240,SRhi10005.GAGT GG.11321,SRhi10013.GATCAG.11397                                                                                                                                                                                                                                                                                                                                                                                                                                                                                                            |
| others | pericyte cell                        | 168 | SRhi10002.CCGTCC.11491,SRhi10004.ACTTGA.11652,SRhi10013.CCGT CC.11518,SRhi10013.CGTACG.11598                                                                                                                                                                                                                                                                                                                                                                                                                                                                                                                                                                                                                                                                                                       |
| others | pigment cell                         | 168 | SRhi10010.GCCAAT.11274,SRhi10015.AGTTCC.11351,SRhi10009.GTTTC G.11423,SRhi10015.CCGTCC.11215,SRhi10015.CGTACG.11528,SRhi1000 7.GATCAG.11608                                                                                                                                                                                                                                                                                                                                                                                                                                                                                                                                                                                                                                                        |
| others | pluripotent stem cell                | 168 | SRhi10037.AGTTCC.3902,SRhi10037.CGTACG.3903,SRhi10037.GGTAGC .3904,SRhi10043.GTGAAA.4080+4081,SRhi10043.GTTTCG.4084,SRhi100 43.GTAGAG.4082+4083                                                                                                                                                                                                                                                                                                                                                                                                                                                                                                                                                                                                                                                    |
| others | precursor cell                       | 168 | SRhi10008.TTAGGC.11224,SRhi10008.CTTGTA.11305,SRhi10009.GTGAA A.11381,SRhi10010.TGACCA.11229,SRhi10009.AGTCAA.11310,SRhi1000                                                                                                                                                                                                                                                                                                                                                                                                                                                                                                                                                                                                                                                                       |



|          |                                   |     |                                                                                                                                                                                                                                                                                                                                                                                                                                                                                                                                                                                                                                                                                                                                                                                                                                                                                                                                                                                               |
|----------|-----------------------------------|-----|-----------------------------------------------------------------------------------------------------------------------------------------------------------------------------------------------------------------------------------------------------------------------------------------------------------------------------------------------------------------------------------------------------------------------------------------------------------------------------------------------------------------------------------------------------------------------------------------------------------------------------------------------------------------------------------------------------------------------------------------------------------------------------------------------------------------------------------------------------------------------------------------------------------------------------------------------------------------------------------------------|
|          |                                   |     | 9.GTGGCC.11386,SRhi10064.CAGATC.11857,SRhi10002.TGACCA.11227,SRhi10015.CTTGTA.11308,SRhi10002.GTGGCC.11384,SRhi10013.ACAGTG.11271,SRhi10007.AGTTCC.11348,SRhi10004.GTTTCG.11420,SRhi10006.CAGATC.11219,SRhi10007.CAGATC.11548,SRhi10012.GCCAAT.11217,SRhi10015.GCCAAT.11537,SRhi10003.ATGTCA.11617,SRhi10002.CAGATC.11547,SRhi10004.ATGTCA.11627,SRhi10003.CAGATC.11536,SRhi10010.GTTTCG.11697,SRhi10013.GGTAGC.11464,SRhi10013.GCCAAT.11218,SRhi10004.CAGATC.11538,SRhi10014.GCCAAT.11214,SRhi10005.CAGATC.11539,SRhi10006.ATGTCA.11619,SRhi10011.GTTTCG.11700,SRhi10008.ATGTCA.11549,SRhi10009.CAGATC.11629,SRhi10009.ATGTCA.11241,SRhi10012.GTTTCG.11322,SRhi10010.CAGATC.11398,SRhi10014.GTTTCG.11352,SRhi10012.CAGATC.11424,SRhi10014.ATGTCA.11276,SRhi10003.CGTACG.11353,SRhi10015.CAGATC.11425,SRhi10015.ATGTCA.11277,SRhi10004.CGTACG.11354,SRhi10002.ACTTGA.11426,SRhi10006.GTAGAG.11240,SRhi10005.GAGTGG.11321,SRhi10013.GATCAG.11397,SRhi10003.TTAGGC.12237,SRhi10013.TTAGGC.12240 |
| others   | protein secreting cell            | 168 | SRhi10002.GTAGAG.11220,SRhi10002.GAGTGG.11301,SRhi10009.GATCAG.11378,SRhi10003.GTAGAG.11255,SRhi10010.GATCAG.11333                                                                                                                                                                                                                                                                                                                                                                                                                                                                                                                                                                                                                                                                                                                                                                                                                                                                            |
| others   | secretory cell                    | 168 | SRhi10011.TTAGGC.11261,SRhi10011.CTTGTA.11338,SRhi10012.GTGAA.A.11410,SRhi10012.TTAGGC.11262,SRhi10012.CTTGTA.11339,SRhi10013.GTGAAA.11411,SRhi10015.ACAGTG.11524,SRhi10009.AGTTCC.11604,SRhi10008.GCCAAT.11487,SRhi10009.GCCAAT.11565,SRhi10014.AGTTCC.11566,SRhi10008.GTTTCG.11567,SRhi10011.GCCAAT.11493,SRhi10002.ATGTCA.11573,SRhi10002.GTAGAG.11220,SRhi10002.GAGTGG.11301,SRhi10009.GATCAG.11378,SRhi10003.GTAGAG.11255,SRhi10010.GATCAG.11333,SRhi10007.GTCCGC.11291,SRhi10004.GGTAGC.11368,SRhi10004.GGCTAC.11440                                                                                                                                                                                                                                                                                                                                                                                                                                                                    |
| others   | smooth muscle cell                | 168 | SRhi10009.GTAGAG.11210,SRhi10008.GTAGAG.11283,SRhi10007.GAGTGG.11360,SRhi10010.GTAGAG.11284,SRhi10008.GAGTGG.11361,SRhi10002.TAGCTT.11433,SRhi10011.GTAGAG.11234,SRhi10009.GAGTGG.11315,SRhi10003.TAGCTT.11391,SRhi10004.TAGCTT.11512,SRhi10012.GTAGAG.11285,SRhi10010.GAGTGG.11362,SRhi10013.GTAGAG.11239,SRhi10011.GAGTGG.11320,SRhi10006.TAGCTT.11396,SRhi10014.GTAGAG.11286,SRhi10012.GAGTGG.11363,SRhi10007.TAGCTT.11435,SRhi10008.TAGCTT.11508,SRhi10015.GTAGAG.11287,SRhi10013.GAGTGG.11364,SRhi10009.TAGCTT.11436,SRhi10002.GTCCGC.11257,SRhi10014.GAGTGG.11335,SRhi10010.TAGCTT.11465,SRhi10003.GTCCGC.11288,SRhi10015.GAGTGG.11365,SRhi10011.TAGCTT.11437,SRhi10004.GTCCGC.11289,SRhi10002.GGTAGC.11366,SRhi10012.TAGCTT.11438,SRhi10013.TAGCTT.11513,SRhi10015.TAGCTT.11212,SRhi10005.GTCCGC.11290,SRhi10003.GGTAGC.11367,SRhi10014.TAGCTT.11439,SRhi10006.GTCCGC.11258,SRhi10002.GGCTAC.11466                                                                                     |
| others   | squamous epithelial cell          | 168 | SRhi10015.TTAGGC.11526,SRhi10014.CTTGTA.11606,SRhi10015.GTGAA.A.11687,SRhi10003.TGACCA.11207,SRhi10002.AGTCAA.11263,SRhi10003.GTGGCC.11340,SRhi10011.GGTAGC.11412,SRhi10004.TGACCA.11264,SRhi10003.AGTCAA.11341,SRhi10004.GTGGCC.11413,SRhi10006.TGACCA.11265,SRhi10006.GTGGCC.11414,SRhi10007.TGACCA.11266,SRhi10006.AGTCAA.11343,SRhi10008.TGACCA.11243,SRhi10007.AGTCAA.11324,SRhi10007.GTGGCC.11400,SRhi10009.TGACCA.11267,SRhi10008.AGTCAA.11344,SRhi10008.GTGGCC.11416,SRhi10003.GCCAAT.11272,SRhi10010.AGTTCC.11349,SRhi10005.GTTTCG.11421,SRhi10004.GCCAAT.11251,SRhi10008.CAGATC.11247,SRhi10007.ATGTCA.11402,SRhi10003.GTAGAG.11255,SRhi10010.GATCAG.11333                                                                                                                                                                                                                                                                                                                          |
| others   | stromal cell                      | 168 | SRhi10011.TTAGGC.11261,SRhi10011.CTTGTA.11338,SRhi10012.GTGAA.A.11410,SRhi10012.TTAGGC.11262,SRhi10012.CTTGTA.11339,SRhi10013.GTGAAA.11411,SRhi10015.ACAGTG.11524,SRhi10009.AGTTCC.11604,SRhi10011.GCCAAT.11493,SRhi10002.ATGTCA.11573,SRhi10003.ACTTGA.11249,SRhi10010.CCGTCC.11254,SRhi10012.CGTACG.11332,SRhi10003.CGTAGT.11405,SRhi10007.GTCCGC.11291,SRhi10004.GGTAGC.11368,SRhi10004.GGCTAC.11440                                                                                                                                                                                                                                                                                                                                                                                                                                                                                                                                                                                       |
| others   | stuff accumulating cell           | 168 | SRhi10011.CGATGT.11376,SRhi10013.GGCTAC.11327,SRhi10012.CGATGT.11473,SRhi10014.GGCTAC.11474,SRhi10002.GTGAAA.11475,SRhi10013.CGATGT.11476,SRhi10014.CGATGT.11259,SRhi10015.GGCTAC.11336,SRhi10003.GTGAAA.11408,SRhi10064.CAGATC.11857,SRhi10003.GCCAAT.11272,SRhi10010.AGTTCC.11349,SRhi10005.GTTTCG.11421,SRhi10004.GCCAAT.11251,SRhi10006.GCCAAT.11232,SRhi10012.AGTTCC.11313,SRhi10006.GTTTCG.11389,SRhi10010.GCCAAT.11274,SRhi10015.AGTTCC.11351,SRhi10009.GTTTCG.11423,SRhi10015.CCGTCC.11215,SRhi10015.CGTACG.11528,SRhi10007.GATCAG.11608                                                                                                                                                                                                                                                                                                                                                                                                                                              |
| others   | supportive cell                   | 168 | SRhi10012.TGACCA.11245,SRhi10011.AGTCAA.11326,SRhi10012.GTAGAG.11401,SRhi10002.CCGTCC.11491,SRhi10004.ACTTGA.11652,SRhi10013.CCGTCC.11518,SRhi10013.CGTACG.11598,SRhi10003.GTAGAG.11255,SRhi10010.GATCAG.11333                                                                                                                                                                                                                                                                                                                                                                                                                                                                                                                                                                                                                                                                                                                                                                                |
| pancreas | stromal cell of pancreas          | 179 | SRhi10003.ACTTGA.11249                                                                                                                                                                                                                                                                                                                                                                                                                                                                                                                                                                                                                                                                                                                                                                                                                                                                                                                                                                        |
| skin     | fibroblast of dermis              | 167 | SRhi10002.ACAGTG.11269,SRhi10013.AGTCAA.11346,SRhi10012.GTGGCC.11418,SRhi10042.GAGTGG.3952+3953                                                                                                                                                                                                                                                                                                                                                                                                                                                                                                                                                                                                                                                                                                                                                                                                                                                                                               |
| skin     | hair follicle dermal papilla cell | 167 | SRhi10013.ACAGTG.11271,SRhi10007.AGTTCC.11348,SRhi10004.GTTTCG.11420                                                                                                                                                                                                                                                                                                                                                                                                                                                                                                                                                                                                                                                                                                                                                                                                                                                                                                                          |
| skin     | keratinocyte                      | 168 | SRhi10003.GCCAAT.11272,SRhi10010.AGTTCC.11349,SRhi10005.GTTTCG.11421                                                                                                                                                                                                                                                                                                                                                                                                                                                                                                                                                                                                                                                                                                                                                                                                                                                                                                                          |

|          |                                                       |     |                                                                                                                                                                                                                                                                                                                                                                                                                                                                                                                                                                                                                                                        |
|----------|-------------------------------------------------------|-----|--------------------------------------------------------------------------------------------------------------------------------------------------------------------------------------------------------------------------------------------------------------------------------------------------------------------------------------------------------------------------------------------------------------------------------------------------------------------------------------------------------------------------------------------------------------------------------------------------------------------------------------------------------|
|          |                                                       |     | 10013.CCGTCC.11518,SRhi10013.CGTACG.11598,SRhi10003.GTAGAG.11255,SRhi10010.GATCAG.11333                                                                                                                                                                                                                                                                                                                                                                                                                                                                                                                                                                |
| pancreas | stromal cell of pancreas                              | 179 | SRhi10003.ACTTGA.11249                                                                                                                                                                                                                                                                                                                                                                                                                                                                                                                                                                                                                                 |
| skin     | fibroblast of dermis                                  | 167 | SRhi10002.ACAGTG.11269,SRhi10013.AGTCAA.11346,SRhi10012.GTG GCC.11418,SRhi10042.GAGTGG.3952+3953                                                                                                                                                                                                                                                                                                                                                                                                                                                                                                                                                       |
| skin     | hair follicle dermal papilla cell                     | 167 | SRhi10013.ACAGTG.11271,SRhi10007.AGTTCC.11348,SRhi10004.GTT TCG.11420                                                                                                                                                                                                                                                                                                                                                                                                                                                                                                                                                                                  |
| skin     | keratinocyte                                          | 168 | SRhi10003.GCCAAT.11272,SRhi10010.AGTTCC.11349,SRhi10005.GTTT CG.11421                                                                                                                                                                                                                                                                                                                                                                                                                                                                                                                                                                                  |
| skin     | keratocyte                                            | 162 | SRhi10005.GCCAAT.11527,SRhi10011.AGTTCC.11607                                                                                                                                                                                                                                                                                                                                                                                                                                                                                                                                                                                                          |
| skin     | light melanocyte                                      | 168 | SRhi10010.GCCAAT.11274,SRhi10015.AGTTCC.11351,SRhi10009.GTTT CG.11423                                                                                                                                                                                                                                                                                                                                                                                                                                                                                                                                                                                  |
| skin     | non-pigmented ciliary epithelial cell                 | 166 | SRhi10014.TTAGGC.11242,SRhi10013.CTTGTA.11323,SRhi10014.GTGA AA.11399                                                                                                                                                                                                                                                                                                                                                                                                                                                                                                                                                                                  |
| vascular | aortic endothelial cell                               | 168 | SRhi10003.TGACCA.11207,SRhi10002.AGTCAA.11263,SRhi10003.GTG GCC.11340,SRhi10011.GGTAGC.11412,SRhi10007.TGACCA.11266,SRhi 10006.AGTCAA.11343                                                                                                                                                                                                                                                                                                                                                                                                                                                                                                            |
| vascular | aortic smooth muscle cell                             | 170 | SRhi10009.GTAGAG.11210,SRhi10008.GTAGAG.11283,SRhi10007.GAG TGG.11360                                                                                                                                                                                                                                                                                                                                                                                                                                                                                                                                                                                  |
| vascular | blood vessel endothelial cell                         | 168 | SRhi10003.TGACCA.11207,SRhi10002.AGTCAA.11263,SRhi10003.GTG GCC.11340,SRhi10011.GGTAGC.11412,SRhi10004.TGACCA.11264,SRhi 10003.AGTCAA.11341,SRhi10004.GTGGCC.11413,SRhi10006.TGACCA. 11265,SRhi10006.GTGGCC.11414,SRhi10007.TGACCA.11266,SRhi1000 6.AGTCAA.11343,SRhi10008.TGACCA.11243,SRhi10007.AGTCAA.1132 4,SRhi10007.GTGGCC.11400,SRhi10009.TGACCA.11267,SRhi10008.AG TCAA.11344,SRhi10008.GTGGCC.11416                                                                                                                                                                                                                                           |
| vascular | capillary endothelial cell                            | 166 | SRhi10006.TGACCA.11265,SRhi10006.GTGGCC.11414                                                                                                                                                                                                                                                                                                                                                                                                                                                                                                                                                                                                          |
| vascular | endothelial cell of artery                            | 168 | SRhi10003.TGACCA.11207,SRhi10002.AGTCAA.11263,SRhi10003.GTG GCC.11340,SRhi10011.GGTAGC.11412,SRhi10004.TGACCA.11264,SRhi 10003.AGTCAA.11341,SRhi10004.GTGGCC.11413,SRhi10007.TGACCA. 11266,SRhi10006.AGTCAA.11343                                                                                                                                                                                                                                                                                                                                                                                                                                      |
| vascular | endothelial cell of vascular tree                     | 168 | SRhi10003.TGACCA.11207,SRhi10002.AGTCAA.11263,SRhi10003.GTG GCC.11340,SRhi10011.GGTAGC.11412,SRhi10004.TGACCA.11264,SRhi 10003.AGTCAA.11341,SRhi10004.GTGGCC.11413,SRhi10005.TGACCA. 11236,SRhi10004.AGTCAA.11317,SRhi10005.GTGGCC.11393,SRhi1000 6.TGACCA.11265,SRhi10006.GTGGCC.11414,SRhi10007.TGACCA.1126 6,SRhi10006.AGTCAA.11343,SRhi10008.TGACCA.11243,SRhi10007.AG TCAA.11324,SRhi10007.GTGGCC.11400,SRhi10009.TGACCA.11267,SR hi10008.AGTCAA.11344,SRhi10008.GTGGCC.11416                                                                                                                                                                     |
| vascular | fibroblast of the aortic adventitia                   | 155 | SRhi10012.TGACCA.11245,SRhi10011.AGTCAA.11326,SRhi10012.GGT AGC.11401                                                                                                                                                                                                                                                                                                                                                                                                                                                                                                                                                                                  |
| vascular | smooth muscle cell of the brachiocephalic vasculature | 168 | SRhi10010.GTAGAG.11284,SRhi10008.GAGTGG.11361,SRhi10002.TAG CTT.11433                                                                                                                                                                                                                                                                                                                                                                                                                                                                                                                                                                                  |
| vascular | smooth muscle cell of the brain vasculature           | 166 | SRhi10011.GTAGAG.11234,SRhi10009.GAGTGG.11315,SRhi10003.TAG CTT.11391                                                                                                                                                                                                                                                                                                                                                                                                                                                                                                                                                                                  |
| vascular | smooth muscle cell of the carotid artery              | 182 | SRhi10012.GTAGAG.11285,SRhi10010.GAGTGG.11362                                                                                                                                                                                                                                                                                                                                                                                                                                                                                                                                                                                                          |
| vascular | smooth muscle cell of the internal thoracic artery    | 168 | SRhi10015.GTAGAG.11287,SRhi10013.GAGTGG.11364,SRhi10009.TAG CTT.11436                                                                                                                                                                                                                                                                                                                                                                                                                                                                                                                                                                                  |
| vascular | smooth muscle cell of the subclavian artery           | 168 | SRhi10015.GTAGAG.11287,SRhi10013.GAGTGG.11364,SRhi10009.TAG CTT.11436,SRhi10004.GTCCGC.11289,SRhi10002.GGTAGC.11366,SRhi 10012.TAGCTT.11438                                                                                                                                                                                                                                                                                                                                                                                                                                                                                                            |
| vascular | thoracic aorta endothelial cell                       | 159 | SRhi10007.TGACCA.11266,SRhi10006.AGTCAA.11343                                                                                                                                                                                                                                                                                                                                                                                                                                                                                                                                                                                                          |
| vascular | vascular associated smooth muscle cell                | 168 | SRhi10009.GTAGAG.11210,SRhi10008.GTAGAG.11283,SRhi10007.GAG TGG.11360,SRhi10010.GTAGAG.11284,SRhi10008.GAGTGG.11361,SRh i10002.TAGCTT.11433,SRhi10011.GTAGAG.11234,SRhi10009.GAGTGG. 11315,SRhi10003.TAGCTT.11391,SRhi10012.GTAGAG.11285,SRhi10010 .GAGTGG.11362,SRhi10014.GTAGAG.11286,SRhi10012.GAGTGG.1136 3,SRhi10007.TAGCTT.11435,SRhi10015.GTAGAG.11287,SRhi10013.GA GTGG.11364,SRhi10009.TAGCTT.11436,SRhi10003.GTCCGC.11288,SR hi10015.GAGTGG.11365,SRhi10011.TAGCTT.11437,SRhi10004.GTCCG C.11289,SRhi10002.GGTAGC.11366,SRhi10012.TAGCTT.11438,SRhi100 15.TAGCTT.11212,SRhi10005.GTCCGC.11290,SRhi10003.GGTAGC.113 67,SRhi10014.TAGCTT.11439 |
| vascular | vein endothelial cell                                 | 168 | SRhi10008.TGACCA.11243,SRhi10007.AGTCAA.11324,SRhi10007.GTG GCC.11400,SRhi10009.TGACCA.11267,SRhi10008.AGTCAA.11344,SRhi 10008.GTGGCC.11416                                                                                                                                                                                                                                                                                                                                                                                                                                                                                                            |

**Supplementary Table S2. A list of the miRNA-target gene prediction databases.**

| <b>Database</b>     | <b>No. miRNAs</b> | <b>No. target genes</b> | <b>Reference PMID</b> | <b>Accessed date</b> | <b>Website</b>                                                                                                                        |
|---------------------|-------------------|-------------------------|-----------------------|----------------------|---------------------------------------------------------------------------------------------------------------------------------------|
| TargetScan<br>Human | 1,530             | 18,366                  | 26267216              | 2012/7/11            | <a href="http://www.targetscan.org/vert_72/">http://www.targetscan.org/vert_72/</a>                                                   |
| DIANA-TarBase       | 1,918             | 18,475                  | 22135297              | 2014/1/23            | <a href="http://diana.imis.athena-innovation.gr/DianaTools/index.php">http://diana.imis.athena-innovation.gr/DianaTools/index.php</a> |
| PITA                | 670               | 16,942                  | 17893677              | 2014/12/15           | <a href="https://genie.weizmann.ac.il/pubs/mir07/mir07_data.html">https://genie.weizmann.ac.il/pubs/mir07/mir07_data.html</a>         |
| miRDB               | 1,916             | 16,655                  | 25378301              | 2014/10/29           | <a href="http://www.mirdb.org/">http://www.mirdb.org/</a>                                                                             |

**Supplementary Table S3. Summary of the GWAS used in the current study.**

| Trait category   | Trait                            | Study model     | No. samples  | No. SNPs  | Ethnicity    | Reference PMID |          |
|------------------|----------------------------------|-----------------|--------------|-----------|--------------|----------------|----------|
| Anthropometric   | Height                           | quantitative    | 253,288      | 2,550,858 | European     | 25282103       |          |
|                  | Height                           | quantitative    | 159,148      | 5,961,600 | Japanese     | -              |          |
|                  | BMI                              | quantitative    | 339,224      | 2,555,510 | European     | 25673413       |          |
|                  | BMI                              | quantitative    | 158,284      | 5,961,600 | Japanese     | 28892062       |          |
| Immune/Allergy   | Rheumatoid arthritis             | case/control    | 80,799       | 9,739,303 | Trans-ethnic | 24390342       |          |
|                  | Systemic lupus erythematosus     | case/control    | 6,899        | 7,793,762 | Japanese     | -              |          |
|                  | Graves' disease                  | case/control    | 9,929        | 6,020,808 | Japanese     | -              |          |
|                  | Crohn's disease                  | case/control    | 30,740       | 953,241   | European     | 23128233       |          |
|                  | Ulcerative colitis               | case/control    | 26,897       | 1,428,749 | European     | 23128233       |          |
|                  | Atopic dermatitis                | case/control    | 9,438        | 6,031,258 | Japanese     | 26482879       |          |
|                  | Asthma                           | case/control    | 36,440       | 5,961,330 | Japanese     | -              |          |
|                  | Pollinosis                       | case/control    | 34,406       | 5,961,329 | Japanese     | -              |          |
|                  | Metabolic                        | Type 2 diabetes | case/control | 110,452   | 2,915,011    | European       | 24509480 |
|                  |                                  | Type 2 diabetes | case/control | 65,702    | 5,961,329    | Japanese       | -        |
| LDL cholesterol  |                                  | quantitative    | 188,577      | 2,692,564 | European     | 20686565       |          |
| HDL cholesterol  |                                  | quantitative    | 188,577      | 2,692,429 | European     | 20686565       |          |
| Triglycerides    |                                  | quantitative    | 188,577      | 2,692,560 | European     | 20686565       |          |
| Musculoskeletal  | Bone mineral density             | quantitative    | 32,961       | 2,554,591 | European     | 22504420       |          |
|                  | Osteoporosis                     | case/control    | 35,969       | 5,961,329 | Japanese     | -              |          |
| Neuropsychiatric | Schizophrenia                    | case/control    | 81,080       | 9,444,230 | European     | 25056061       |          |
|                  | Epilepsy                         | case/control    | 30,979       | 5,961,329 | Japanese     | -              |          |
|                  | Alzheimer's disease              | case/control    | 54,162       | 7,055,881 | European     | 24162737       |          |
| Eye-related      | Age-related macular degeneration | case/control    | 56,494       | 2,399,382 | European     | 23455636       |          |
|                  | Glaucoma                         | case/control    | 22,795       | 5,961,599 | Japanese     | -              |          |
| Cardiovascular   | Arteriosclerosis obliterans      | case/control    | 32,252       | 5,961,329 | Japanese     | -              |          |
|                  | Myocardial infarction            | case/control    | 4,864        | 4,773,769 | Japanese     | 24916648       |          |
|                  | Coronary artery disease          | case/control    | 194,427      | 9,455,778 | European     | 23202125       |          |
|                  | Atrial fibrillation              | case/control    | 36,792       | 5,018,048 | Japanese     | 28416822       |          |
|                  | Cerebral aneurysm                | case/control    | 31,467       | 5,961,329 | Japanese     | -              |          |
|                  | Ischemic stroke                  | case/control    | 43,550       | 5,961,330 | Japanese     | -              |          |
|                  | Systolic blood pressure          | quantitative    | 69,395       | 2,650,287 | European     | 21909115       |          |
|                  | Diastolic blood pressure         | quantitative    | 69,395       | 2,673,126 | European     | 21909115       |          |
| Lung-related     | COPD                             | case/control    | 31,920       | 5,961,329 | Japanese     | -              |          |
| Kidney-related   | Uric acid                        | quantitative    | 110,347      | 2,207,610 | European     | 23263486       |          |
|                  | eGFR                             | quantitative    | 67,093       | 2,724,035 | European     | 20383146       |          |
| Liver-related    | Chronic hepatitis B              | case/control    | 29,962       | 5,961,329 | Japanese     | -              |          |

|               |                     |              |         |           |          |          |
|---------------|---------------------|--------------|---------|-----------|----------|----------|
|               | Chronic hepatitis C | case/control | 33,858  | 5,961,329 | Japanese | -        |
| Genitourinary | Age at menarche     | quantitative | 182,416 | 2,441,815 | European | 25231870 |
|               | Uterine fibroid     | case/control | 23,212  | 5,961,329 | Japanese | -        |
|               | Urolithiasis        | case/control | 35,116  | 5,961,329 | Japanese | -        |
| Hematological | Red blood cell      | quantitative | 71,861  | 2,589,454 | European | 23222517 |
|               | Platelet            | quantitative | 66,867  | 2,703,393 | European | 22139419 |
| Malignancy    | Lung cancer         | case/control | 31,052  | 5,932,052 | Japanese | -        |
|               | Esophageal cancer   | case/control | 28,403  | 5,932,052 | Japanese | -        |
|               | Gastric cancer      | case/control | 33,349  | 5,932,052 | Japanese | -        |
|               | Colorectal cancer   | case/control | 33,870  | 5,932,052 | Japanese | -        |
|               | Breast cancer       | case/control | 21,768  | 5,932,052 | Japanese | -        |
|               | Endometrial cancer  | case/control | 19,423  | 5,961,329 | Japanese | -        |
|               | Prostate cancer     | case/control | 15,770  | 5,932,052 | Japanese | -        |

---

BMI; body mass index, LDL cholesterol; low-density lipoprotein cholesterol, HDL cholesterol; high-density lipoprotein cholesterol, COPD; chronic obstructive pulmonary disease, eGFR; estimated glomerular filtration rate.

**Supplementary Table S4. Characteristics of the patients and control subject enrolled in differentially expressed miRNA analysis.**

|                                   | <b>RA (n = 30)</b> | <b>HC (n = 33)</b> |
|-----------------------------------|--------------------|--------------------|
| Age, years                        | 67 (57-75)         | 37 (33-55)         |
| Sex, % female                     | 83.3               | 39.4               |
| Duration of symptoms, months      | 12 (6-12)          | NA                 |
| RF positive, %                    | 83.3               | NA                 |
| ACPA positive, %                  | 56.7               | NA                 |
| DAS28-CRP                         | 3.66 (2.98-4.80)   | NA                 |
| miRNA-seq raw read count, million | 6.29 (5.47-8.12)   | 5.34 (3.98-6.37)   |
| Mapped rate to miRNA, %           | 4.81 (3.97-6.44)   | 9.10 (5.62-11.22)  |

Values are the median (interquartile range).

RA; rheumatoid arthritis, HC; healthy control, RF; rheumatoid factor, ACPA; anti-citrullinated protein antibody, DAS; disease activity score, CRP; C-reactive protein.

**Supplementary Table S5. Meta-analysis of the rheumatoid arthritis (RA) GWAS and the *in silico* replication study at three genetic loci containing candidate biomarker miRNA.**

| rsID          | Chr    | Position   | Allele<br>1/2 | Gene              | Stage            | Cohort           | No. subjects |          | Allele 1 frequency |          | OR (95%CI)       | P      |
|---------------|--------|------------|---------------|-------------------|------------------|------------------|--------------|----------|--------------------|----------|------------------|--------|
|               |        |            |               |                   |                  |                  | RA cases     | Controls | RA cases           | Controls |                  |        |
| rs34130487    | 7      | 99,759,205 | C/T           | MIR95-<br>MIR106B | GWAS             | Brass            | 483          | 1,631    | 0.739              | 0.739    | 1.05 (0.88-1.25) | 0.57   |
|               |        |            |               |                   |                  | Canada           | 589          | 1,554    | 0.725              | 0.737    | 0.94 (0.81-1.10) | 0.44   |
|               |        |            |               |                   |                  | Eira             | 1,097        | 1,044    | 0.741              | 0.723    | 1.10 (0.96-1.26) | 0.16   |
|               |        |            |               |                   |                  | Narac1           | 863          | 1,191    | 0.726              | 0.746    | 0.91 (0.77-1.08) | 0.29   |
|               |        |            |               |                   |                  | Narac2           | 896          | 6,603    | 0.739              | 0.729    | 1.11 (0.99-1.25) | 0.081  |
|               |        |            |               |                   |                  | Wtccc            | 1,520        | 10,507   | 0.727              | 0.709    | 1.10 (1.00-1.20) | 0.039  |
|               |        |            |               |                   |                  | ReAct            | 275          | 804      | 0.752              | 0.715    | 1.20 (0.97-1.50) | 0.099  |
|               |        |            |               |                   |                  | Dutch            | 1,172        | 1,684    | 0.720              | 0.693    | 1.18 (1.04-1.33) | 0.0098 |
|               |        |            |               |                   |                  | ACR-Ref          | 347          | 264      | 0.731              | 0.743    | 0.98 (0.71-1.33) | 0.88   |
|               |        |            |               |                   |                  | Corrona          | 894          | 1,838    | 0.725              | 0.725    | 0.99 (0.87-1.13) | 0.91   |
|               |        |            |               |                   |                  | Vandy            | 739          | 2,247    | 0.709              | 0.724    | 0.93 (0.82-1.06) | 0.27   |
|               |        |            |               |                   |                  | iChip_ES         | -            | -        | -                  | -        | -                | -      |
|               |        |            |               |                   |                  | iChip_NL         | -            | -        | -                  | -        | -                | -      |
|               |        |            |               |                   |                  | iChip_SE-E       | -            | -        | -                  | -        | -                | -      |
|               |        |            |               |                   |                  | iChip_SE-U       | -            | -        | -                  | -        | -                | -      |
|               |        |            |               |                   |                  | iChip_UK         | -            | -        | -                  | -        | -                | -      |
|               |        |            |               |                   |                  | iChip_US         | -            | -        | -                  | -        | -                | -      |
|               |        |            |               |                   |                  | iChip_i2b2       | -            | -        | -                  | -        | -                | -      |
|               |        |            |               |                   |                  | BBJ              | 2,414        | 14,245   | 0.532              | 0.512    | 1.08 (1.02-1.16) | 0.011  |
|               |        |            |               |                   |                  | Kyoto            | 1,237        | 2,087    | 0.545              | 0.505    | 1.19 (1.07-1.33) | 0.0015 |
|               |        |            |               |                   |                  | Korea            | 799          | 751      | 0.475              | 0.459    | 1.07 (0.93-1.24) | 0.35   |
| Replication   | IORRA2 | 2,354      | 5,252         | 0.550             | 0.516            | 1.13 (1.06-1.22) | 5.0.E-04     |          |                    |          |                  |        |
| BBJ3          | 954    | 3,105      | 0.532         | 0.518             | 1.06 (0.95-1.18) | 0.29             |              |          |                    |          |                  |        |
| Meta-analysis | -      | 16,633     | 54,807        | 0.627             | 0.620            | 1.08 (1.05-1.11) | 3.3.E-08     |          |                    |          |                  |        |
| rs56656810    | 16     | 30,788,759 | A/C           | MIR762            | GWAS             | Brass            | 483          | 1,631    | 0.287              | 0.261    | 1.13 (0.94-1.35) | 0.18   |
|               |        |            |               |                   |                  | Canada           | 589          | 1,554    | 0.287              | 0.265    | 1.10 (0.95-1.29) | 0.21   |
|               |        |            |               |                   |                  | Eira             | 1,097        | 1,044    | 0.283              | 0.263    | 1.11 (0.97-1.27) | 0.15   |
|               |        |            |               |                   |                  | Narac1           | 863          | 1,191    | 0.263              | 0.270    | 1.01 (0.86-1.20) | 0.89   |
|               |        |            |               |                   |                  | Narac2           | 896          | 6,603    | 0.256              | 0.271    | 0.95 (0.85-1.07) | 0.42   |
|               |        |            |               |                   |                  | Wtccc            | 1,520        | 10,507   | 0.279              | 0.258    | 1.12 (1.02-1.22) | 0.015  |
|               |        |            |               |                   |                  | ReAct            | 275          | 804      | 0.294              | 0.253    | 1.28 (1.02-1.59) | 0.030  |
|               |        |            |               |                   |                  | Dutch            | 1,172        | 1,684    | 0.261              | 0.251    | 1.08 (0.95-1.22) | 0.24   |
|               |        |            |               |                   |                  | ACR-Ref          | 347          | 264      | 0.285              | 0.268    | 1.12 (0.83-1.51) | 0.46   |
|               |        |            |               |                   |                  | Corrona          | 894          | 1,838    | 0.283              | 0.262    | 1.12 (0.98-1.27) | 0.10   |
|               |        |            |               |                   |                  | Vandy            | 739          | 2,247    | 0.256              | 0.255    | 1.00 (0.88-1.15) | 0.9562 |
|               |        |            |               |                   |                  | iChip_ES         | 397          | 399      | 0.283              | 0.263    | 1.11 (0.86-1.42) | 0.42   |
|               |        |            |               |                   |                  | iChip_NL         | 303          | 2,001    | 0.264              | 0.251    | 1.06 (0.85-1.33) | 0.60   |
|               |        |            |               |                   |                  | iChip_SE-E       | 740          | 1,117    | 0.276              | 0.265    | 1.05 (0.91-1.22) | 0.52   |
|               |        |            |               |                   |                  | iChip_SE-U       | 522          | 962      | 0.306              | 0.273    | 1.20 (1.00-1.43) | 0.044  |
|               |        |            |               |                   |                  | iChip_UK         | 1,645        | 6,082    | 0.275              | 0.252    | 1.11 (1.01-1.22) | 0.023  |
|               |        |            |               |                   |                  | iChip_US         | 997          | 2,132    | 0.292              | 0.277    | 1.09 (0.96-1.23) | 0.20   |
|               |        |            |               |                   |                  | iChip_i2b2       | 882          | 1,863    | 0.274              | 0.261    | 1.08 (0.95-1.23) | 0.23   |
|               |        |            |               |                   |                  | BBJ              | 2,414        | 14,245   | 0.087              | 0.087    | 1.00 (0.90-1.12) | 1.00   |
|               |        |            |               |                   |                  | Kyoto            | 1,237        | 2,087    | 0.089              | 0.069    | 1.33 (1.09-1.62) | 0.0042 |
|               |        |            |               |                   |                  | Korea            | 799          | 751      | 0.091              | 0.082    | 1.16 (0.88-1.53) | 0.30   |
| Replication   | IORRA2 | 2,354      | 5,252         | 0.093             | 0.084            | 1.14 (1.00-1.29) | 0.046        |          |                    |          |                  |        |
| BBJ3          | 954    | 3,105      | 0.094         | 0.089             | 1.08 (0.90-1.29) | 0.43             |              |          |                    |          |                  |        |
| Meta-analysis | -      | 22,119     | 69,363        | 0.211             | 0.196            | 1.09 (1.05-1.12) | 3.6.E-08     |          |                    |          |                  |        |
| rs11089637    | 22     | 21,979,096 | C/T           | MIR301B           | GWAS             | Brass            | 483          | 1,631    | 0.172              | 0.165    | 1.12 (0.91-1.37) | 0.28   |
|               |        |            |               |                   |                  | Canada           | 589          | 1,554    | 0.171              | 0.157    | 1.17 (0.96-1.42) | 0.12   |
|               |        |            |               |                   |                  | Eira             | 1,097        | 1,044    | 0.193              | 0.189    | 1.05 (0.89-1.23) | 0.57   |
|               |        |            |               |                   |                  | Narac1           | 863          | 1,191    | 0.186              | 0.157    | 1.27 (1.03-1.57) | 0.027  |
|               |        |            |               |                   |                  | Narac2           | 896          | 6,603    | 0.166              | 0.163    | 1.04 (0.90-1.20) | 0.62   |
|               |        |            |               |                   |                  | Wtccc            | 1,520        | 10,507   | 0.182              | 0.166    | 1.14 (1.03-1.28) | 0.017  |
|               |        |            |               |                   |                  | ReAct            | 275          | 804      | 0.168              | 0.159    | 1.08 (0.81-1.44) | 0.60   |
|               |        |            |               |                   |                  | Dutch            | 1,172        | 1,684    | 0.191              | 0.187    | 1.03 (0.88-1.21) | 0.68   |
|               |        |            |               |                   |                  | ACR-Ref          | 347          | 264      | 0.174              | 0.170    | 0.92 (0.60-1.40) | 0.70   |
|               |        |            |               |                   |                  | Corrona          | 894          | 1,838    | 0.173              | 0.157    | 1.12 (0.96-1.31) | 0.14   |
|               |        |            |               |                   |                  | Vandy            | 739          | 2,247    | 0.167              | 0.154    | 1.10 (0.94-1.30) | 0.23   |
|               |        |            |               |                   |                  | iChip_ES         | 397          | 399      | 0.188              | 0.158    | 1.15 (0.85-1.55) | 0.36   |
|               |        |            |               |                   |                  | iChip_NL         | 303          | 2,001    | 0.173              | 0.162    | 1.13 (0.87-1.45) | 0.36   |
|               |        |            |               |                   |                  | iChip_SE-E       | 740          | 1,117    | 0.183              | 0.183    | 1.00 (0.84-1.18) | 0.95   |
|               |        |            |               |                   |                  | iChip_SE-U       | 522          | 962      | 0.178              | 0.179    | 1.02 (0.83-1.26) | 0.85   |
|               |        |            |               |                   |                  | iChip_UK         | 1,645        | 6,082    | 0.175              | 0.150    | 1.20 (1.08-1.33) | 0.0010 |
|               |        |            |               |                   |                  | iChip_US         | 997          | 2,132    | 0.171              | 0.160    | 1.10 (0.94-1.28) | 0.23   |
|               |        |            |               |                   |                  | iChip_i2b2       | 882          | 1,863    | 0.174              | 0.166    | 1.15 (0.99-1.35) | 0.071  |
|               |        |            |               |                   |                  | BBJ              | 2,414        | 14,245   | 0.472              | 0.464    | 1.03 (0.97-1.10) | 0.33   |
|               |        |            |               |                   |                  | Kyoto            | 1,237        | 2,087    | 0.459              | 0.454    | 1.02 (0.91-1.14) | 0.73   |
|               |        |            |               |                   |                  | Korea            | 799          | 751      | 0.440              | 0.419    | 1.09 (0.95-1.26) | 0.23   |
| Replication   | IORRA2 | 2,354      | 5,252         | 0.484             | 0.468            | 1.06 (0.99-1.14) | 0.12         |          |                    |          |                  |        |
| BBJ3          | 954    | 3,105      | 0.473         | 0.468             | 1.02 (0.92-1.13) | 0.66             |              |          |                    |          |                  |        |
| Meta-analysis | -      | 22,119     | 69,363        | 0.280             | 0.273            | 1.07 (1.05-1.10) | 3.7.E-07     |          |                    |          |                  |        |

Details of the study cohorts were described in Okada et al. **Nature** 2014 (GWAS) and Okada et al. **Am J Hum Genet** 2016 (replication study). Since all the RA cases of one GWAS cohort ( $n = 423$  in IORRA) were also included in the replication cohort (IORRA2), we removed the former one in the meta-analysis. SNP genotype data of rs34130487 was not available in the cohorts genotyped using the ImmunoChip platform.



**Supplementary Table S6. The result of the tissue-specific MIGWAS.**

| Category                   | Trait                            | Immune-related cells                           | Top-associated tissue          | Top-associated cell name                       |
|----------------------------|----------------------------------|------------------------------------------------|--------------------------------|------------------------------------------------|
| Anthropometric             | Height (European)                | -                                              | skin                           | hair follicle dermal papilla cell              |
|                            | Height (Japanese)                | -                                              | fat                            | preadipocyte of the breast                     |
|                            | BMI (European)                   | neutrophil                                     | bone                           | human chondrocyte de-differentiated sample     |
|                            | BMI (Japanese)                   | -                                              | skin                           | light melanocyte                               |
| Immune/Allergy             | Rheumatoid arthritis             | phagocyte                                      | lung                           | bronchial smooth muscle cell                   |
|                            | Systemic lupus erythematosus     | mast cell                                      | immune                         | mast cell                                      |
|                            | Graves' disease                  | CD14-positive CD16-negative classical monocy   | immune                         | CD14-positive CD16-negative classical monocy   |
|                            | Crohn's disease                  | mast cell                                      | immune                         | mast cell                                      |
|                            | Ulcerative colitis               | -                                              | muscle                         | skeletal muscle myoblast                       |
|                            | Atopic dermatitis                | mesenchymal stem cell of the bone marrow       | bone                           | bone cell                                      |
|                            | Asthma                           | neutrophil                                     | immune                         | neutrophil                                     |
|                            | Pollinosis                       | -                                              | kidney                         | human renal cortical epithelial cell sample    |
|                            | Metabolic                        | Type 2 diabetes (European)                     | fibroblast of lymphatic vessel | brain                                          |
| Type 2 diabetes (Japanese) |                                  | mast cell- stimulated sample                   | fetal                          | human amniotic membrane cell- Amnion sample    |
| Bone mineral density       |                                  | fibroblast of lymphatic vessel                 | skin                           | keratinocyte                                   |
| Osteoporosis               |                                  | -                                              | fat                            | fibroblast of mammary gland                    |
| LDL cholesterol            |                                  | -                                              | fat                            | subcutaneous fat cell                          |
| HDL cholesterol            |                                  | natural killer cel                             | immune                         | natural killer cel                             |
| Triglycerides              |                                  | -                                              | brain                          | central nervous system pericyte                |
| Neuropsychiatric           | Schizophrenia                    | CD14-positive CD16-negative classical monocyte | immune                         | CD14-positive CD16-negative classical monocyte |
|                            | Epilepsy                         | myeloid leukocyte                              | immune                         | myeloid leukocyte                              |
|                            | Alzheimer's disease              | B cell                                         | immune                         | B cell                                         |
| Eye-related                | Age-related macular degeneration | -                                              | fetal                          | fibroblast of villous mesenchyme               |
|                            | Glaucoma                         | mature alpha-beta T cell                       | skin                           | keratinocyte                                   |
| Cardiovascular             | Arteriosclerosis obliterans      | fibroblast of lymphatic vessel                 | gastrointestinal               | smooth muscle cell of the esophagus            |
|                            | Myocardial infarction            | -                                              | immune                         | mesenchymal stem cell of the bone marrow       |
|                            | Coronary artery disease          | immature conventional dendritic cell           | fat                            | subcutaneous fat cell                          |
|                            | Atrial fibrillation              | -                                              | immune                         | CD4-positive alpha-beta T cell                 |
|                            | Cerebral aneurysm                | -                                              | fetal                          | iPS                                            |
|                            | Ischemic stroke                  | -                                              | bone                           | human chondrocyte re-differentiated sample     |
|                            | Systolic blood pressure          | -                                              | muscle                         | skeletal muscle satellite cell                 |
|                            | Diastolic blood pressure         | B cell                                         | brain                          | Schwann cell                                   |
| Lung-related               | COPD                             | -                                              | eye                            | fibroblast of the conjunctiva                  |
| Kidney-related             | Uric acid                        | CD14-positive CD16-negative classical monocyte | others                         | GAG secreting cell                             |
|                            | eGFR                             | -                                              | cardiac                        | fibroblast of cardiac tissue                   |
| Liver-related              | Chronic hepatitis B              | phagocyte                                      | fetal                          | human amniotic membrane cell- Amnion sample    |
|                            | Chronic hepatitis C              | mast cell- stimulated sample                   | immune                         | mast cell- stimulated sample                   |
| Genitourinary              | Age at menarche                  | -                                              | brain                          | human pituitary gland - adult sample           |
|                            | Uterine fibroid                  | -                                              | fetal                          | fibroblast of villous mesenchyme               |
|                            | Urolithiasis                     | -                                              | fetal                          | fibroblast of villous mesenchyme               |
| Hematological              | Red blood cell                   | human CD14-positive monocyte sample            | immune                         | human CD14-positive monocyte sample            |
|                            | Platelet                         | -                                              | gastrointestinal               | keratinized cell of the oral mucosa            |
| Malignancy                 | Lung cancer                      | -                                              | brain                          | human diencephalon - adult sample              |
|                            | Esophageal cancer                | -                                              | lung                           | bronchial smooth muscle cell                   |
|                            | Gastric cancer                   | -                                              | fat                            | perirenal preadipocyte                         |
|                            | Colorectal cancer                | -                                              | bone                           | nucleus pulposus cell of intervertebral disc   |
|                            | Breast cancer                    | -                                              | vascular                       | smooth muscle cell of the subclavian artery    |
|                            | Endometrial cancer               | neutrophil                                     | liver                          | endothelial cell of hepatic sinusoid           |
|                            | Prostate cancer                  | -                                              | fetal                          | embryonic stem cell                            |

**Supplementary Table S7. The result of summary-level data Mendelian randomization.**

| Gene            | Top SNP    | Allele 1 | Allele 2 | Freq  | b_GWAS | se_GWAS | p_GWAS  | b_eQTL | se_eQTL | p_eQTL   | b_SMR  | se_SMR | p_SMR   | p_HEIDI |
|-----------------|------------|----------|----------|-------|--------|---------|---------|--------|---------|----------|--------|--------|---------|---------|
| <i>CPNE5</i>    | rs1064827  | T        | C        | 0.251 | 0.033  | 0.018   | 6.5E-02 | 0.191  | 0.031   | 1.3E-09  | 0.171  | 0.097  | 7.7E-02 | 3.8E-01 |
| <i>DAP</i>      | rs5745297  | A        | G        | 0.080 | -0.023 | 0.048   | 6.3E-01 | 0.873  | 0.051   | 3.6E-66  | -0.027 | 0.055  | 6.3E-01 | 6.2E-01 |
| <i>FADS2</i>    | rs968567   | T        | C        | 0.150 | -0.104 | 0.021   | 7.3E-07 | 0.458  | 0.038   | 7.8E-33  | -0.227 | 0.050  | 4.8E-06 | 5.1E-01 |
| <i>GATS</i>     | rs2528900  | A        | G        | 0.268 | -0.057 | 0.017   | 6.6E-04 | 0.911  | 0.032   | 4.3E-184 | -0.062 | 0.018  | 7.2E-04 | 7.1E-02 |
| <i>INPP5B</i>   | rs28525112 | C        | G        | 0.445 | -0.093 | 0.018   | 1.4E-07 | -0.595 | 0.028   | 2.2E-100 | 0.156  | 0.031  | 3.1E-07 | 4.5E-02 |
| <i>IQGAP1</i>   | rs2074585  | G        | A        | 0.466 | -0.056 | 0.018   | 1.5E-03 | -0.522 | 0.027   | 2.2E-80  | 0.108  | 0.034  | 1.7E-03 | 1.2E-01 |
| <i>IRF5</i>     | rs10954215 | T        | C        | 0.368 | -0.055 | 0.013   | 4.6E-05 | 1.173  | 0.027   | 0.0E+00  | -0.047 | 0.011  | 4.9E-05 | 1.9E-12 |
| <i>ITSN1</i>    | rs2300375  | T        | C        | 0.304 | -0.054 | 0.017   | 1.0E-03 | -0.525 | 0.030   | 1.6E-68  | 0.104  | 0.032  | 1.3E-03 | 2.0E-02 |
| <i>PADI2</i>    | rs11576552 | C        | A        | 0.368 | -0.089 | 0.016   | 5.2E-08 | -0.517 | 0.029   | 3.7E-73  | 0.172  | 0.033  | 1.8E-07 | 5.0E-04 |
| <i>PFKL</i>     | rs2838547  | C        | G        | 0.161 | 0.070  | 0.020   | 4.1E-04 | 0.340  | 0.041   | 5.4E-17  | 0.205  | 0.063  | 1.1E-03 | 1.3E-01 |
| <i>PGAP3</i>    | rs2934951  | A        | G        | 0.318 | -0.083 | 0.014   | 2.3E-09 | 0.471  | 0.030   | 3.0E-57  | -0.177 | 0.032  | 2.2E-08 | 2.0E-03 |
| <i>RAF1</i>     | rs12629082 | G        | A        | 0.432 | 0.052  | 0.018   | 3.8E-03 | 0.280  | 0.028   | 8.1E-24  | 0.187  | 0.067  | 5.3E-03 | 3.0E-01 |
| <i>SLC25A23</i> | rs393375   | A        | T        | 0.469 | -0.007 | 0.021   | 7.3E-01 | -0.309 | 0.028   | 9.9E-29  | 0.024  | 0.069  | 7.3E-01 | 1.2E-01 |
| <i>SLC44A2</i>  | rs78671428 | T        | G        | 0.087 | 0.046  | 0.029   | 1.1E-01 | -0.972 | 0.053   | 2.5E-75  | -0.048 | 0.030  | 1.2E-01 | 5.9E-01 |
| <i>SYNGR1</i>   | rs2069235  | A        | G        | 0.299 | 0.113  | 0.016   | 7.6E-13 | 0.394  | 0.030   | 1.3E-38  | 0.288  | 0.046  | 3.5E-10 | 2.7E-01 |
| <i>TMPRSS3</i>  | rs2277798  | A        | G        | 0.374 | -0.010 | 0.014   | 4.6E-01 | -0.290 | 0.028   | 1.6E-25  | 0.035  | 0.048  | 4.6E-01 | 7.5E-05 |
| <i>TNFRSF14</i> | rs7544646  | C        | G        | 0.531 | 0.057  | 0.013   | 2.3E-05 | -0.445 | 0.028   | 1.5E-57  | -0.128 | 0.031  | 4.3E-05 | 2.3E-04 |
| <i>TRAF1</i>    | rs4310279  | G        | A        | 0.278 | 0.063  | 0.015   | 2.5E-05 | -0.418 | 0.031   | 9.6E-42  | -0.152 | 0.038  | 5.7E-05 | 5.6E-02 |
| <i>TSPAN33</i>  | rs12667978 | C        | T        | 0.458 | 0.046  | 0.021   | 2.7E-02 | 0.293  | 0.029   | 3.7E-24  | 0.158  | 0.073  | 3.0E-02 | 1.1E-02 |
| <i>UBASH3A</i>  | rs1893592  | C        | A        | 0.276 | -0.106 | 0.015   | 3.7E-12 | 0.464  | 0.031   | 1.1E-50  | -0.228 | 0.036  | 3.0E-10 | 5.8E-07 |
| <i>UTP11L</i>   | rs35129114 | T        | C        | 0.264 | -0.101 | 0.020   | 2.8E-07 | -0.243 | 0.030   | 9.5E-16  | 0.417  | 0.096  | 1.5E-05 | 5.8E-02 |

Freq; allele frequency of allele 1, b\_GWAS; beta coefficient of allele 1 in GWAS, se\_GWAS; standard error in GWAS, p\_GWAS; P value in GWAS, b\_eQTL; beta coefficient of allele 1 in eQTL, se\_eQTL; standard error in eQTL, p\_eQTL; P value in eQTL, b\_SMR; beta coefficient of allele 1 in SMR, se\_SMR; standard error in SMR, p\_SMR; P value in SMR, p\_HEIDI; P value in HEIDI analysis.

**Supplementary Figure S1. The principal component analysis on the expression profiles of mature miRNAs.**

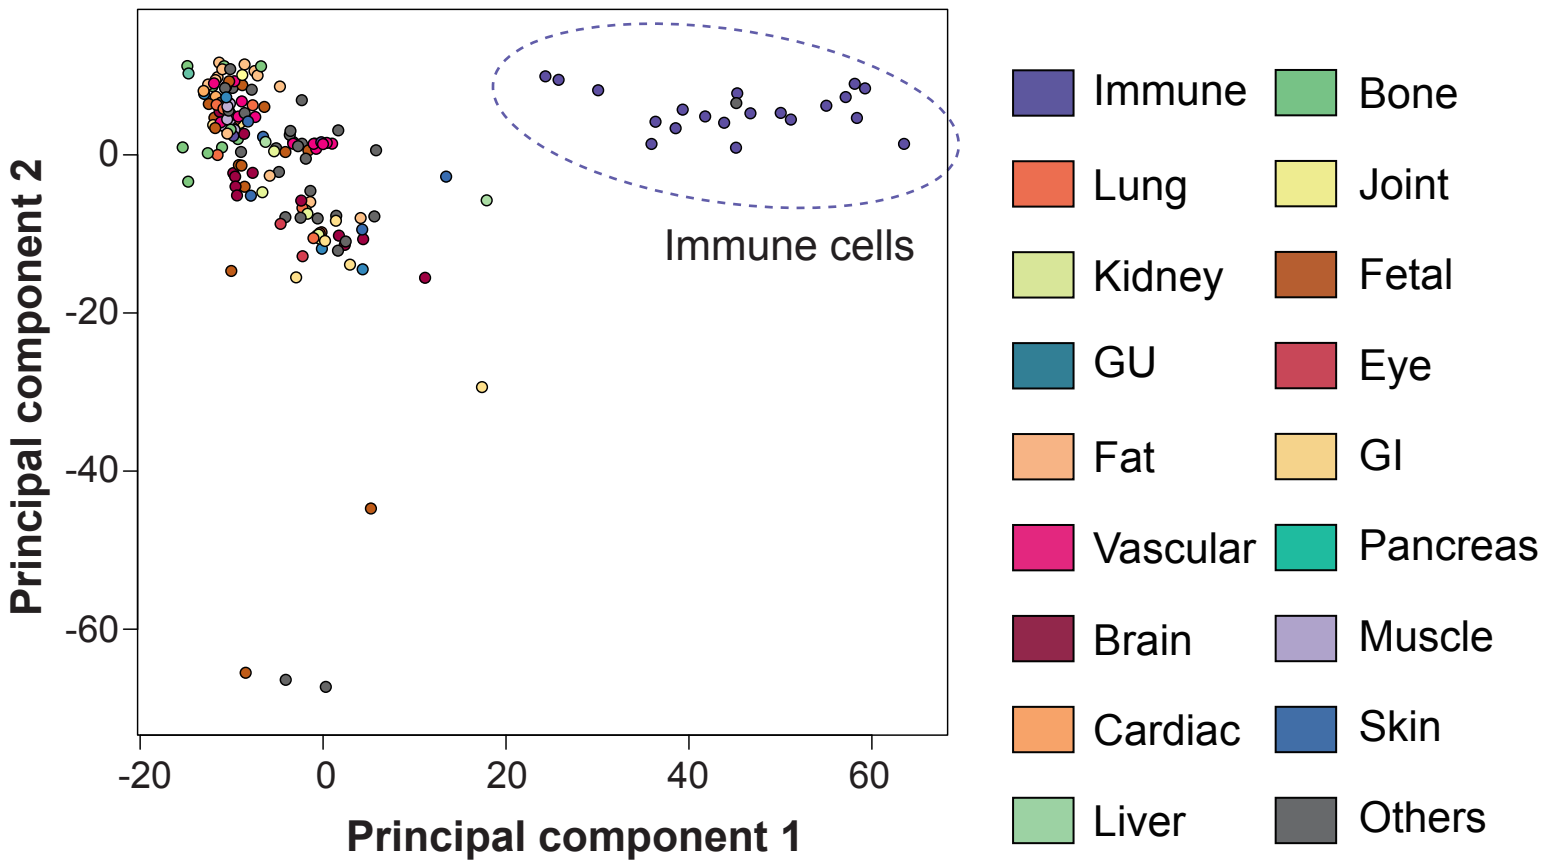

Each circle represents the principal component 1 and 2 of the miRNA expression profile in each cell. The color of each circle indicates the tissue which the cell was collected from. GU; genitourinary, GI; gastrointestinal.

**Supplementary Figure S2. The effect of the tissue specificity index (TSI) threshold on the set of highly and specifically expressed miRNAs and on the statistics from MIGWAS.**

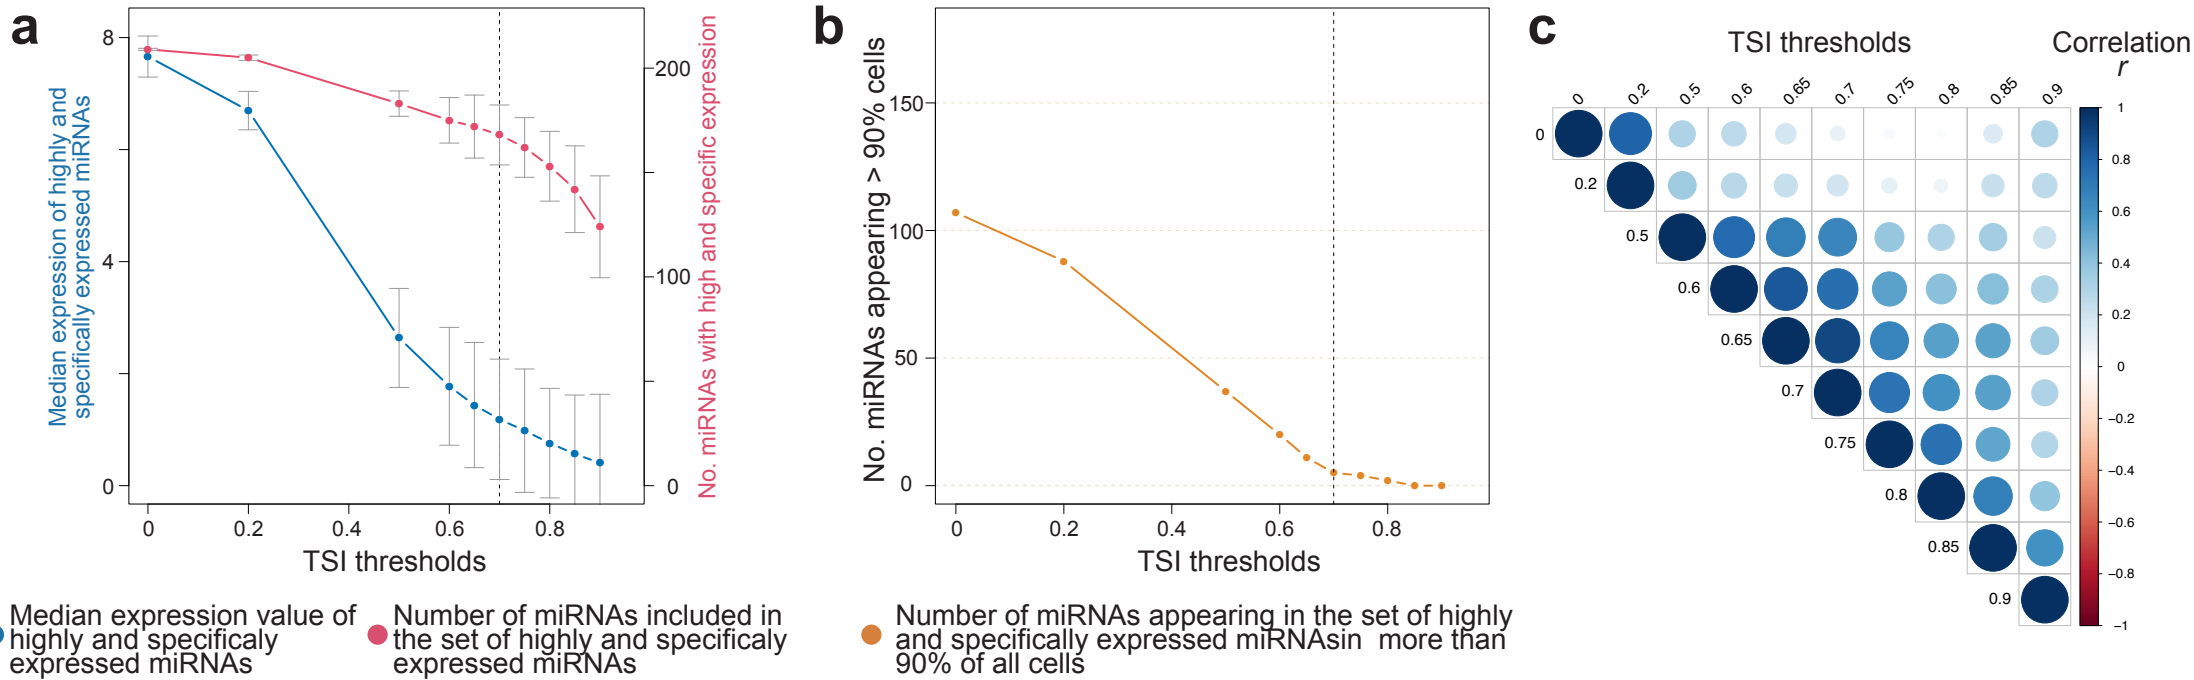

(a) Blue circles are the median expression counts and their standard deviations (bars) of highly and specifically expressed miRNAs by the TSI thresholds. Red circles are the median numbers of miRNAs and their standard deviations (bars) with high and specific expression in each cell by the TSI thresholds. (b) The number of miRNAs included in a set of highly and specifically expressed miRNAs in more than 90% of 179 cells. (c) The correlation plot of MIGWAS statistics by the TSI thresholds. Color intensity and the size of the circles are proportional to the correlation coefficients.

**Supplementary Figure S3. *In vitro* support of *in silico* miRNA-gene target prediction algorithms.**

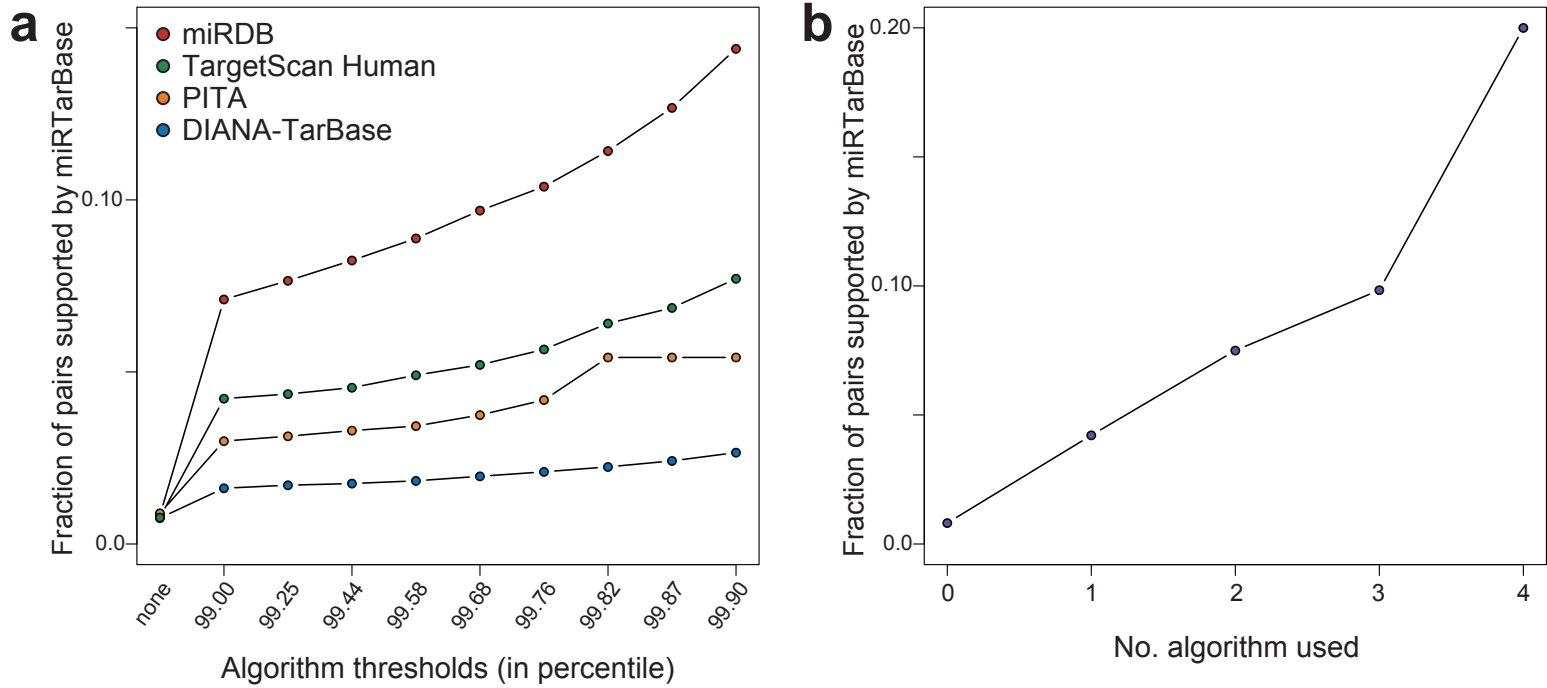

The fraction of *in silico* predicted miRNA-gene target pairs supported by miRTarBase (either reporter assay, western blot, microarray or next-generation sequencing) by the thresholds in percentile for each algorithm (**a**) and by the number of algorithms used (**b**).

**Supplementary Figure S4. A histogram of the number of the overlapped miRNAs from MIGWAS pipeline and the differential expression analysis by the permutation procedure.**

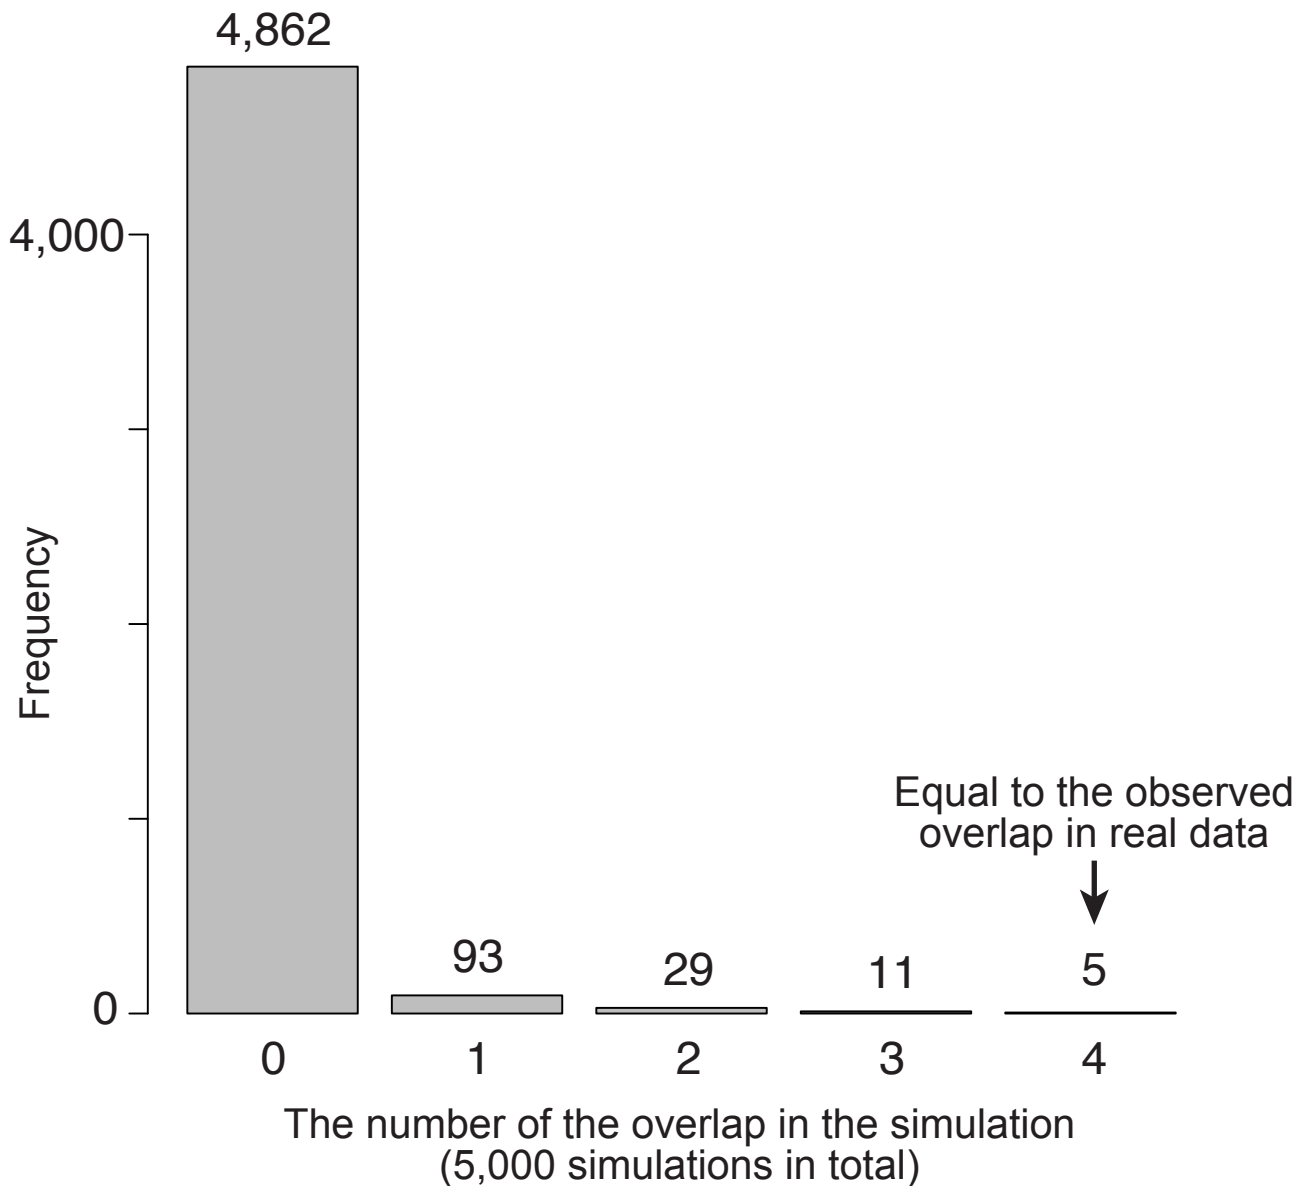

Bars represent the distribution of the number of the overlapped miRNAs included both in MIGWAS candidate miRNAs for RA and the differential expression experiment of RA and HC samples in 5,000 permutation steps. The number shown above each bar is the number of permutation steps within each bin. The rightmost bin, with four overlapped miRNAs, was equal to the observed overlap in real data.
